# Supplementary material for: Remote working and occupational stress: Effects on IT-enabled industry employees in Hyderabad Metro, India
Source: Front Psychol. 2023 Mar 29;14:1069402. doi: 10.3389/fpsyg.2023.1069402 (PMC10090500; doi:10.3389/fpsyg.2023.1069402)
Supplement: Supplementary file 1 [file Table_1.XLSX]

## Sheet: Form Responses 1
											RW	RW	RW	rw		RE	RW	RW	RW	RW		RW	RW	rw	rw	te		JS	js	js	js	js
											SP	SP	SP	SP		TECH	TECH	tech	tech	tech		TW	TW	TW	tw	TW		JS	JS	JS	JS	JS		IMO	IMO	IMO	IMO		EMO	EMO	EMO	emo		PER	PER	PER	PER	PER	PER
Gender	Age group in years	Educational qualifications	Employment	Are you married?	Do you have children	Do you experience stress during the job?	Do you smoke ?	Are you diabetic?	Do you have hypertension?	Do you consume alcohol	1. I can communicate through various modes and can prioritize the communication modes like email, whatsapp, chat, skype based on the importance	2. I have enough knowledge/technical know-how to carry out my work remotely without or with minimal supervision	14. I am able to connect my colleagues through remote working will have the same fun and chat	13. I have some past experience working remotely without interacting with colleagues		3. All the required resources (laptop/desktop/internet) etc for remote working are provided to the employees	4. My organization provides all the software/technology needed for remote working (like team viewer, MS team etc)	5. The technology provided able you connected to others while remote working Technology	6. There is a scope for digital/virtual meetings of staff with peer	7. My meeting with your peer/staff are remote-friendly		8. My role is essential for achieving the objectives of the Team/organization through remote working	9 I am part of Essential Delivery Service Team and my role is demanding through remote operations	10. I feel absence from office or workplace isolation	11. I am able to connect your colleagues through remote working will have the same fun and chat	12. I feel alienated from the workplace and teamwork during remote working		15. I am fully engaged while working from home	16. My job satisfaction levels are same even working at home	17. Things have changed due to this pandemic and I do not like my job now	18. Working at my organization has a great deal of personal meaning and prestige tome	19. It is pleasure to be associated with my organization		20. I am very much interested in my work	21. My peer always make my work interesting avoiding mundane and repetitive tasks	22. I have always praised and by my peer for my good work	23. Feedback on my performance always motivates to me to do good work		24. My level of competence is better than my colleagues	25. Job insecurity is one of the reasons for my hard work	26. My salary is comparable with my work	27. Job security is the concern for me in the organization		28. I am able to complete the given assignments within the time	29. Achieving the targets are somewhat tough	30. I do commit mistakes in my assignments	31. I am eager learn more new things in pursuit of professional perfection	32. Work pressure does not demotivates me Stress impacts my working style and behavior	33. I am more focused towards the organization goals though work load causes stress
1	1	PG and Above	Software professional	1	1	1	0	1	1	1	4	4	4	4	4	2	3	2	4	4	3	1	4	2	4	3	2.8	4	5	5	2	4	4	4	5	5	5	4.75	4	4	4	4	4	4	4	5	4	4	4
0	1	Graduate	BPO employee	1	1	0	0	0	0	0	4	4	4	4	4	3	4	3	2	2	2.8	2	1	1	3	4	2.2	4	4	5	4	4	4.2	4	4	4	4	4	4	4	4	4	4	4	4	4	4	4	4
1	1	PG and Above	Software Professional	1	1	1	0	1	1	1	4	4	4	4	4	3	4	4	2	2	3	4	3	4	5	4	4	4	4	4	3	4	3.8	4	4	4	4	4	4	4	4	4	4	4	4	4	4	4	4
1	1	PG and Above	Staff in Agricultural Research Sector	1	1	1	1	0	0	1	4	5	5	5	4.75	2	3	2	1	3	2.2	4	3	1	4	4	3.2	5	4	4	2	5	4	4	4	4	4	4	4	4	4	4	4	4	4	4	4	4	4
0	1	Graduate	Staff in Agricultural Research Sector	1	1	0	1	1	1	1	4	4	4	4	4	1	5	5	1	3	3	5	5	4	5	5	4.8	4	4	4	4	3	3.8	4	4	4	4	4	4	4	4	4	4	4	4	4	4	4	4
0	1	PG and Above	Software Professional	1	1	1	0	0	0	1	4	4	4	4	4	2	5	4	2	4	3.4	1	3	3	4	4	3	4	4	4	2	4	3.6	2	2	2	4	2.5	4	4	4	4	4	4	4	2	4	4	4
0	1	PG and Above	Software Professional	1	1	1	1	1	1	1	4	4	4	4	4	2	4	2	5	4	3.4	2	3	2	4	2	2.6	4	4	4	3	4	3.8	4	4	4	4	4	4	4	4	4	4	4	4	4	4	4	4
0	1	PG and Above	Staff in Agricultural Research Sector	1	1	1	1	1	1	0	4	4	4	4	4	3	4	3	2	2	2.8	4	4	2	4	4	3.6	5	5	4	2	4	4	4	4	4	4	4	4	4	4	4	4	4	4	4	4	4	4
0	1	PG and Above	Staff in Agricultural Research Sector	1	1	1	1	1	1	0	2	2	2	4	2.5	2	4	2	3	2	2.6	3	4	3	4	3	3.4	4	5	5	3	4	4.2	4	4	4	5	4.25	4	4	4	4	4	4	2	4	4	4	4
1	1	PG and Above	Staff in Agricultural Research Sector	1	1	1	1	1	1	1	4	4	4	4	4	5	3	3	3	3	3.4	3	4	4	3	4	3.6	4	5	4	3	4	4	2	2	4	2	2.5	4	4	4	4	4	1	2	2	4	4	4
0	1	Graduate	Staff in Agricultural Research Sector	1	1	0	1	1	1	1	4	4	4	4	4	2	4	4	5	3	3.6	3	4	3	4	4	3.6	5	5	5	4	4	4.6	2	4	4	4	3.5	2	2	4	5	3.25	5	2	4	1	2	2
0	1	PG and Above	Staff in Agricultural Research Sector	1	1	0	1	0	0	1	4	4	4	5	4.25	5	1	1	5	1	2.6	5	1	1	1	4	2.4	4	4	4	2	4	3.6	4	5	5	5	4.75	5	5	4	4	4.5	5	5	5	4	5	4
1	1	PG and Above	Staff in Agricultural Research Sector	1	1	1	1	0	0	0	2	2	4	2	2.5	4	3	2	4	4	3.4	2	5	4	4	4	3.8	4	4	4	4	4	4	4	5	5	5	4.75	5	5	5	4	4.75	4	4	4	5	5	4
1	1	Graduate	Staff in Agricultural Research Sector	1	1	1	1	0	0	1	2	4	4	4	3.5	4	4	5	4	4	4.2	4	5	4	4	4	4.2	4	4	4	2	4	3.6	2	4	4	2	3	4	4	4	4	4	4	2	2	4	2	5
0	1	PG and Above	Staff in Agricultural Research Sector	1	1	1	1	1	1	1	4	5	5	5	4.75	2	4	3	2	2	2.6	1	2	2	4	4	2.6	4	4	4	4	2	3.6	4	4	4	4	4	4	4	4	4	4	4	4	4	4	4	4
0	1	PG and Above	Staff in Agricultural Research Sector	1	1	0	1	1	1	1	4	5	5	5	4.75	4	4	4	4	4	4	3	4	4	4	4	3.8	2	2	4	2	4	2.8	4	5	5	4	4.5	4	4	4	4	4	4	4	4	4	4	4
1	1	PG and Above	Staff in Agricultural Research Sector	1	1	1	1	0	0	1	2	4	4	2	3	2	3	1	3	3	2.4	3	1	3	4	4	3	4	4	4	1	5	3.6	4	4	4	4	4	4	4	4	5	4.25	4	4	4	4	4	4
0	1	Graduate	Staff in Agricultural Research Sector	1	1	1	1	1	1	1	4	4	4	4	4	2	3	5	4	4	3.6	3	4	2	4	3	3.2	4	4	4	3	3	3.6	5	4	5	5	4.75	5	5	5	5	5	4	4	4	4	4	5
0	1	Graduate	Staff in Agricultural Research Sector	1	1	1	1	0	0	1	4	5	5	4	4.5	4	3	4	3	1	3	3	4	3	4	4	3.6	4	4	5	4	3	4	4	4	5	5	4.5	5	5	5	4	4.75	4	5	5	4	5	4
1	1	Plus Two (Intermediate)	Software Professional	1	1	1	1	1	1	1	4	4	4	4	4	2	4	1	4	2	2.6	5	5	5	5	4	4.8	2	4	2	3	5	3.2	4	4	5	5	4.5	4	4	4	2	3.5	4	4	4	4	4	4
1	1	Graduate	Software Professional	1	1	1	1	1	1	1	5	4	5	5	4.75	5	4	5	4	4	4.4	3	5	4	5	5	4.4	4	4	4	3	3	3.6	4	4	4	5	4.25	5	4	5	4	4.5	4	4	4	4	4	4
0	1	PG and Above	Software Professional	1	1	1	1	0	0	1	4	4	5	5	4.5	5	3	5	3	4	4	4	5	4	5	5	4.6	5	5	5	4	4	4.6	4	4	4	4	4	4	4	4	4	4	4	4	4	4	4	4
0	1	PG and Above	Staff in Agricultural Research Sector	1	1	1	1	1	1	1	4	4	5	5	4.5	2	4	4	2	2	2.8	3	3	3	4	4	3.4	5	5	5	3	4	4.4	4	5	4	4	4.25	4	4	4	4	4	4	4	4	4	4	4
0	1	PG and Above	Staff in Agricultural Research Sector	1	1	1	1	1	1	1	4	4	4	5	4.25	4	4	4	3	3	3.6	3	3	3	3	3	3	4	4	2	5	5	4	4	4	4	4	4	4	4	4	4	4	4	4	4	4	4	1
0	1	PG and Above	Staff in Agricultural Research Sector	1	1	1	1	1	1	1	4	4	4	4	4	3	4	4	4	3	3.6	3	3	3	3	3	3	4	4	4	3	4	3.8	4	4	4	4	4	4	5	5	5	4.75	4	4	4	4	4	5
1	1	PG and Above	Administrative Staff	1	1	1	1	1	1	1	4	5	4	4	4.25	2	5	2	1	1	2.2	4	3	1	4	4	3.2	5	5	4	2	4	4	4	4	4	4	4	4	4	4	4	4	4	4	4	4	4	2
0	1	Graduate	Staff in Agricultural Research Sector	1	1	1	1	1	1	1	4	4	4	4	4	4	3	3	3	3	3.2	4	3	3	4	4	3.6	4	4	4	2	3	3.4	5	5	5	4	4.75	4	4	4	4	4	4	4	4	4	4	4
1	1	PG and Above	Software Professional	1	1	1	1	0	0	1	4	4	4	4	4	2	4	5	1	2	2.8	2	2	2	2	2	2	4	5	5	3	3	4	4	4	5	5	4.5	5	5	5	5	5	4	4	4	4	4	4
1	1	PG and Above	Staff in Agricultural Research Sector	1	1	1	1	1	1	0	4	4	4	4	4	3	4	2	2	4	3	3	4	4	3	3	3.4	4	5	5	2	4	4	4	4	5	4	4.25	5	5	4	4	4.5	4	4	4	4	4	4
0	1	PG and Above	Software Professional	1	1	1	1	1	1	1	5	5	5	4	4.75	2	4	4	2	2	2.8	4	2	2	4	4	3.2	4	5	5	3	5	4.4	4	5	5	5	4.75	5	5	5	2	4.25	4	4	4	5	5	4
1	1	Other	Software Professional	1	1	1	1	0	0	1	4	4	5	5	4.5	3	4	3	3	2	3	3	3	2	3	3	2.8	4	4	5	4	4	4.2	4	5	4	4	4.25	4	4	4	4	4	4	4	4	4	4	4
0	1	PG and Above	Software Professional	0	0	0	1	0	0	0	4	4	5	4	4.25	3	4	4	5	3	3.8	3	3	3	3	4	3.2	4	4	4	4	4	4	4	4	4	4	4	4	4	4	4	4	4	4	4	4	4	4
0	1	Graduate	Software Professional	1	1	1	1	1	1	1	4	5	5	5	4.75	4	4	4	2	2	3.2	4	2	2	5	5	3.6	5	4	4	2	5	4	4	4	4	4	4	4	4	4	4	4	4	4	4	4	4	4
0	1	PG and Above	Staff in Agricultural Research Sector	1	1	1	1	1	1	1	4	4	4	4	4	2	4	3	2	2	2.6	4	4	4	4	4	4	3	3	3	3	4	3.2	4	4	4	4	4	4	5	5	4	4.5	4	4	4	4	4	4
0	1	Graduate	Software Professional	1	1	0	1	0	0	0	4	4	4	4	4	4	4	4	4	4	4	4	4	4	4	4	4	5	3	4	4	4	4	4	4	5	4	4.25	4	4	4	4	4	4	4	4	4	4	4
0	1	PG and Above	Software Professional	1	1	1	1	0	0	1	4	4	4	4	4	2	4	4	3	2	3	4	2	2	4	4	3.2	2	4	5	2	5	3.6	4	5	5	5	4.75	5	5	5	4	4.75	4	4	4	4	4	4
1	1	Graduate	Software Professional	1	1	1	1	1	1	1	4	4	4	4	4	4	2	5	3	3	3.4	3	4	4	4	4	3.8	4	4	5	4	3	4	1	5	5	2	3.25	5	5	5	5	5	4	1	1	2	1	4
0	1	Graduate	Software Professional	1	1	0	0	0	0	1	2	2	2	4	2.5	2	4	3	2	2	2.6	4	3	3	4	4	3.6	4	2	3	2	4	3	4	4	4	4	4	4	4	5	4	4.25	4	4	5	1	2	4
0	1	PG and Above	BPO employee	1	1	1	1	0	0	1	4	4	4	4	4	1	5	5	4	2	3.4	3	5	2	5	4	3.8	2	2	2	2	4	2.4	4	4	4	4	4	4	4	4	4	4	4	4	4	4	4	4
0	1	Graduate	Software Professional	1	1	1	1	1	1	1	4	4	4	4	4	3	3	3	3	3	3	3	3	3	3	3	3	2	4	4	2	4	3.2	4	5	5	5	4.75	5	5	4	4	4.5	4	4	4	4	4	4
0	1	Other	Software Professional	1	1	1	1	1	1	1	4	4	4	5	4.25	4	3	5	3	4	3.8	2	5	5	4	4	4	4	4	4	4	4	4	4	4	4	5	4.25	4	4	4	4	4	4	4	4	4	4	4
0	1	PG and Above	Administrative Staff	1	1	1	1	0	0	0	2	2	4	2	2.5	3	5	3	2	2	3	5	3	3	5	4	4	2	4	4	4	4	3.6	4	4	4	4	4	4	4	5	5	4.5	4	4	4	2	2	4
0	1	Graduate	Software Professional	1	1	1	1	0	0	1	2	4	4	4	3.5	3	3	4	3	4	3.4	3	4	3	4	4	3.6	2	5	4	4	4	3.8	4	4	4	4	4	4	4	4	4	4	4	4	4	4	4	4
1	1	Graduate	Staff in Agricultural Research Sector	1	1	1	1	0	0	1	4	5	5	5	4.75	4	4	4	4	4	4	4	4	4	4	4	4	3	4	4	3	3	3.4	4	4	4	4	4	4	4	4	5	4.25	2	2	4	4	2	2
0	1	Graduate	Staff in Agricultural Research Sector	1	0	0	1	0	0	1	4	5	5	5	4.75	3	4	2	2	2	2.6	5	4	5	1	5	4	3	3	4	3	5	3.6	4	4	4	4	4	4	5	4	4	4.25	4	4	4	4	2	4
1	1	Graduate	Software Professional	1	1	1	1	1	1	1	2	4	4	2	3	5	5	5	5	5	5	5	5	5	5	5	5	4	3	3	4	4	3.6	2	4	4	4	3.5	4	4	4	4	4	4	4	4	4	4	4
0	1	Graduate	Staff in Agricultural Research Sector	1	1	1	1	0	0	1	4	4	4	4	4	3	4	4	1	1	2.6	4	2	3	4	4	3.4	4	1	3	3	4	3	4	4	4	4	4	4	4	4	5	4.25	4	4	4	4	4	4
0	1	PG and Above	Staff in Agricultural Research Sector	1	1	1	1	1	1	1	4	5	5	4	4.5	2	4	3	2	2	2.6	4	2	4	4	4	3.6	2	3	3	2	4	2.8	4	4	4	5	4.25	4	5	5	5	4.75	4	4	4	4	4	2
0	1	PG and Above	Staff in Agricultural Research Sector	1	1	1	1	1	1	1	4	4	4	4	4	2	3	4	1	2	2.4	3	3	1	5	4	3.2	5	3	3	5	5	4.2	4	4	4	4	4	4	5	4	4	4.25	4	4	4	2	2	4
0	1	Graduate	Software Professional	1	1	1	1	0	0	1	5	4	5	5	4.75	3	3	3	2	2	2.6	4	3	3	4	4	3.6	5	3	3	4	4	3.8	4	4	5	5	4.5	4	4	4	5	4.25	4	4	4	4	4	4
0	1	Graduate	Staff in Agricultural Research Sector	1	1	1	1	1	1	0	4	4	5	5	4.5	2	4	4	2	2	2.8	2	5	3	4	5	3.8	4	3	3	4	3	3.4	4	4	4	4	4	4	4	4	4	4	4	4	4	4	4	4
0	1	Graduate	Staff in Agricultural Research Sector	1	1	1	1	0	0	1	4	4	5	5	4.5	3	5	5	2	5	4	5	3	1	4	4	3.4	5	3	4	5	3	4	4	4	4	4	4	4	4	4	4	4	4	4	4	2	2	4
0	1	PG and Above	Staff in Agricultural Research Sector	1	1	1	1	0	0	1	4	4	4	5	4.25	4	4	3	2	2	3	4	5	3	5	5	4.4	5	3	3	4	4	3.8	4	4	4	4	4	4	4	4	5	4.25	4	4	4	4	4	4
0	1	Graduate	Staff in Agricultural Research Sector	1	1	0	1	0	0	1	4	4	4	4	4	4	4	4	4	3	3.8	4	3	2	4	4	3.4	3	3	3	4	3	3.2	4	4	4	4	4	4	4	4	4	4	4	4	4	4	4	4
0	1	Graduate	Staff in Agricultural Research Sector	1	1	1	1	0	0	1	4	5	4	4	4.25	2	5	4	1	2	2.8	5	4	2	5	5	4.2	4	3	2	5	5	3.8	4	4	4	4	4	4	4	4	4	4	4	4	4	2	2	4
0	1	Graduate	Software Professional	1	1	1	1	0	0	1	4	3	3	3	3.25	3	4	5	3	3	3.6	3	3	4	4	4	3.6	3	4	3	3	4	3.4	4	5	4	2	3.75	4	4	4	5	4.25	4	4	4	2	2	4
0	1	Graduate	Staff in Agricultural Research Sector	1	1	1	1	1	1	1	5	5	3	4	4.25	4	4	4	3	3	3.6	4	3	3	5	4	3.8	4	3	4	4	5	4	2	4	4	4	3.5	4	4	4	4	4	4	4	4	2	2	4
0	1	PG and Above	Staff in Agricultural Research Sector	1	1	1	1	0	0	1	5	2	4	5	4	2	5	4	2	2	3	4	4	2	5	4	3.8	3	3	3	4	2	3	4	4	4	4	4	4	4	4	5	4.25	4	4	4	2	2	4
0	1	Graduate	Staff in Agricultural Research Sector	1	1	1	1	0	0	1	4	4	4	5	4.25	4	3	3	4	4	3.6	4	4	2	4	3	3.4	4	3	3	3	4	3.4	4	4	4	4	4	4	4	4	4	4	4	4	4	2	2	4
0	1	Graduate	Software Professional	1	1	1	1	0	0	1	5	4	2	3	3.5	2	4	4	3	2	3	3	5	2	2	4	3.2	2	3	3	4	2	2.8	4	4	4	4	4	4	4	4	4	4	4	4	4	2	4	5
0	1	PG and Above	Staff in Agricultural Research Sector	1	1	1	1	0	0	1	4	2	2	2	2.5	2	4	4	3	2	3	4	2	2	4	4	3.2	4	3	4	5	5	4.2	4	4	4	4	4	4	4	4	4	4	4	4	4	2	2	4
0	1	PG and Above	Staff in Agricultural Research Sector	1	1	1	1	0	0	1	5	2	4	4	3.75	2	4	2	2	2	2.4	4	2	2	5	5	3.6	3	4	4	4	3	3.6	4	4	4	4	4	4	4	4	4	4	4	4	4	2	2	4
1	1	PG and Above	Software Professional	1	1	1	1	0	0	1	4	4	4	4	4	4	4	4	4	4	4	4	4	4	4	4	4	4	3	3	4	3	3.4	4	4	4	4	4	4	5	5	4	4.5	4	4	4	2	2	4
1	1	PG and Above	Software Professional	1	1	1	1	1	1	1	5	2	4	4	3.75	4	4	4	3	2	3.4	4	4	4	2	3	3.4	5	1	5	4	5	4	4	4	4	4	4	5	4	4	4	4.25	4	4	4	4	4	4
0	1	PG and Above	Staff in Agricultural Research Sector	1	1	1	1	0	0	1	4	2	5	4	3.75	4	4	4	4	4	4	3	3	3	3	3	3	3	3	3	3	3	3	4	4	4	4	4	4	4	4	4	4	2	4	2	4	4	4
1	1	Graduate	Staff in Agricultural Research Sector	1	1	1	1	1	1	1	5	3	4	4	4	3	3	4	2	4	3.2	2	2	4	2	3	2.6	4	5	4	3	4	4	4	4	4	4	4	4	4	4	4	4	4	4	4	2	2	4
0	1	Plus Two (Intermediate)	Staff in Agricultural Research Sector	1	1	1	1	0	0	1	4	3	3	4	3.5	3	5	3	5	4	4	4	3	2	4	3	3.2	4	3	4	3	3	3.4	4	4	4	4	4	4	4	4	4	4	4	4	4	2	2	2
0	1	Graduate	Staff in Agricultural Research Sector	1	1	1	1	1	1	1	4	4	3	3	3.5	4	4	4	4	4	4	4	3	4	4	3	3.6	3	1	3	2	3	2.4	4	4	4	4	4	4	4	4	4	4	4	4	4	4	4	4
1	1	PG and Above	Staff in Agricultural Research Sector	1	1	1	1	1	1	1	5	4	1	3	3.25	3	4	4	3	2	3.2	2	4	3	2	4	3	4	3	4	4	4	3.8	4	4	4	4	4	4	4	4	5	4.25	4	2	4	2	2	2
1	1	PG and Above	Staff in Agricultural Research Sector	1	1	1	1	0	1	1	2	2	3	3	2.5	2	4	3	3	3	3	3	2	3	4	3	3	3	3	3	3	4	3.2	4	4	4	4	4	4	5	4	4	4.25	4	4	4	4	4	4
1	1	Other	Staff in Agricultural Research Sector	1	1	1	1	1	1	1	5	5	3	3	4	5	5	3	3	4	4	4	1	3	3	3	2.8	4	3	2	3	2	2.8	4	5	5	4	4.5	5	4	5	4	4.5	4	4	4	4	4	4
0	1	PG and Above	Staff in Agricultural Research Sector	1	1	1	1	0	1	1	5	5	3	3	4	4	4	4	3	3	3.6	3	3	3	3	3	3	4	3	3	3	3	3.2	4	4	4	4	4	4	5	4	4	4.25	4	4	4	4	4	4
0	1	PG and Above	Staff in Agricultural Research Sector	1	1	1	1	1	1	1	4	4	3	3	3.5	4	3	3	3	3	3.2	3	3	3	3	1	2.6	3	3	3	3	3	3	5	5	4	4	4.5	5	5	4	4	4.5	4	4	5	4	4	4
0	1	Graduate	Staff in Agricultural Research Sector	1	1	1	1	0	1	1	5	5	3	4	4.25	5	3	4	3	3	3.6	2	3	3	3	3	2.8	3	4	4	3	4	3.6	4	5	4	4	4.25	4	4	4	4	4	4	5	2	4	4	2
0	1	SSC	Staff in Agricultural Research Sector	1	1	1	1	1	1	1	5	5	3	3	4	4	4	4	3	3	3.6	2	4	4	3	3	3.2	3	3	3	4	4	3.4	4	4	4	4	4	4	4	5	4	4.25	4	4	5	4	4	2
0	1	Plus Two (Intermediate)	Staff in Agricultural Research Sector	1	1	1	1	0	1	1	2	3	3	3	2.75	4	3	4	3	5	3.8	1	3	3	5	4	3.2	3	3	3	3	4	3.2	4	4	4	4	4	4	4	5	5	4.5	4	4	4	2	4	4
0	1	PG and Above	Software Professional	1	1	1	1	1	1	1	3	4	3	2	3	5	5	3	3	1	3.4	4	3	4	5	5	4.2	3	3	3	3	4	3.2	4	4	5	4	4.25	4	4	4	4	4	2	4	5	4	4	2
1	1	Graduate	Software Professional	1	1	1	1	1	1	1	5	3	4	3	3.75	3	4	3	3	3	3.2	3	3	4	4	4	3.6	2	4	3	3	3	3	4	4	4	4	4	4	4	4	4	4	2	2	4	2	4	4
0	1	PG and Above	Software Professional	1	1	1	1	0	1	1	2	4	3	4	3.25	4	5	5	5	2	4.2	4	4	2	3	2	3	2	2	2	3	2	2.2	4	4	4	4	4	4	4	4	4	4	4	4	4	4	4	4
0	1	PG and Above	Staff in Agricultural Research Sector	1	1	1	1	1	1	1	2	3	3	3	2.75	4	2	2	4	3	3	4	4	3	3	4	3.6	3	3	4	4	3	3.4	4	4	4	5	4.25	4	4	4	4	4	4	4	4	4	4	4
1	1	Plus Two (Intermediate)	Staff in Agricultural Research Sector	1	1	1	1	0	1	1	4	4	3	3	3.5	3	4	3	4	3	3.4	4	3	4	3	4	3.6	5	5	3	5	5	4.6	2	4	4	4	3.5	4	5	4	4	4.25	4	4	4	2	2	4
0	1	PG and Above	Staff in Agricultural Research Sector	1	1	1	1	1	1	1	4	2	3	3	3	4	2	4	2	4	3.2	2	3	4	3	4	3.2	4	4	4	4	4	4	4	4	4	4	4	4	4	4	4	4	2	2	4	4	4	4
1	1	Plus Two (Intermediate)	Administrative Staff	1	1	1	1	1	1	1	4	4	3	4	3.75	5	5	2	3	4	3.8	4	3	3	5	3	3.6	2	3	3	2	3	2.6	4	4	4	4	4	4	4	4	4	4	4	2	4	4	2	4
0	1	SSC	Staff in Agricultural Research Sector	1	1	1	1	0	1	1	1	3	4	4	3	4	3	4	4	3	3.6	1	3	3	4	3	2.8	2	4	4	2	4	3.2	4	4	4	4	4	4	5	4	4	4.25	4	4	4	4	4	4
0	1	Plus Two (Intermediate)	Software Professional	1	1	1	1	1	1	1	2	4	3	3	3	4	3	3	3	3	3.2	3	2	4	3	4	3.2	2	4	4	1	4	3	2	4	4	4	3.5	4	4	4	4	4	2	4	4	2	2	4
1	1	PG and Above	Staff in Agricultural Research Sector	1	1	1	1	1	1	1	2	5	1	5	3.25	4	5	3	5	5	4.4	4	4	5	3	5	4.2	2	3	3	4	2	2.8	2	4	4	4	3.5	4	4	4	4	4	4	4	4	4	2	4
0	1	Other	Software Professional	1	1	1	1	0	1	1	3	3	3	3	3	3	3	3	3	3	3	3	3	3	3	3	3	1	3	2	2	4	2.4	4	4	4	4	4	4	4	4	4	4	4	4	4	2	2	4
0	1	Graduate	Software Professional	1	1	1	1	1	1	1	2	4	5	4	3.75	3	4	2	3	3	3	4	4	2	4	3	3.4	4	5	5	3	4	4.2	4	4	4	5	4.25	4	4	4	4	4	4	4	4	2	2	4
1	1	Graduate	Software Professional	1	1	1	1	0	1	1	4	4	3	4	3.75	3	3	3	3	3	3	3	3	2	3	4	3	2	3	3	4	3	3	4	4	4	4	4	4	4	4	4	4	4	4	4	4	2	4
1	1	PG and Above	Software Professional	1	1	1	1	1	1	1	4	3	1	3	2.75	2	3	3	2	4	2.8	3	3	2	5	5	3.6	3	2	4	4	2	3	4	4	4	4	4	5	4	5	4	4.5	4	4	4	4	4	4
0	1	Plus Two (Intermediate)	Staff in Agricultural Research Sector	1	1	1	1	0	1	1	4	4	3	4	3.75	4	4	2	3	3	3.2	1	3	3	3	3	2.6	2	4	4	3	2	3	2	4	4	5	3.75	4	4	4	4	4	4	4	4	4	4	4
0	1	Graduate	Software Professional	1	1	1	1	1	1	1	2	3	3	3	2.75	3	4	3	4	3	3.4	2	4	3	4	4	3.4	5	4	3	4	2	3.6	4	5	5	4	4.5	4	5	4	5	4.5	4	4	4	4	4	2
0	1	Plus Two (Intermediate)	Software Professional	1	1	1	1	1	1	1	4	4	3	2	3.25	3	2	3	3	3	2.8	1	5	3	3	3	3	4	3	4	3	4	3.6	4	4	4	4	4	5	4	4	4	4.25	2	4	4	4	4	5
0	1	Plus Two (Intermediate)	Software Professional	1	1	1	1	0	1	1	3	4	3	3	3.25	3	3	3	4	3	3.2	3	2	3	3	2	2.6	5	3	2	5	3	3.6	4	4	4	4	4	4	4	4	4	4	4	4	2	2	4	4
0	1	PG and Above	Software Professional	1	1	1	1	1	1	1	4	3	3	3	3.25	3	3	4	2	4	3.2	3	3	3	3	4	3.2	4	4	3	4	4	3.8	4	4	4	4	4	4	4	4	4	4	4	4	4	2	4	4
0	1	Graduate	BPO employee	1	1	1	1	0	1	1	4	3	4	4	3.75	3	4	4	4	4	3.8	3	4	4	3	3	3.4	3	3	4	5	5	4	4	4	5	4	4.25	4	4	5	5	4.5	4	4	4	4	4	2
0	1	Graduate	Software Professional	1	1	1	1	0	1	1	5	3	3	3	3.5	4	4	4	4	4	4	4	2	4	3	4	3.4	3	4	3	3	3	3.2	4	4	4	4	4	4	4	4	5	4.25	4	4	4	4	4	5
0	1	PG and Above	Software Professional	1	1	1	1	1	1	1	2	3	3	3	2.75	3	4	3	4	3	3.4	3	3	3	3	3	3	3	4	3	4	3	3.4	4	4	4	4	4	4	4	4	4	4	2	4	4	2	4	4
1	1	Other	Administrative Staff	1	1	1	1	1	1	1	4	3	3	3	3.25	3	4	3	3	1	2.8	4	3	3	3	4	3.4	3	4	3	4	2	3.2	4	4	4	4	4	4	4	4	4	4	4	4	4	2	4	4
1	1	Graduate	Software Professional	1	1	1	1	1	1	1	4	2	4	3	3.25	3	3	3	3	3	3	2	2	2	4	3	2.6	4	1	3	3	2	2.6	4	5	5	5	4.75	4	4	4	4	4	4	4	5	4	4	4
1	2	Plus Two (Intermediate)	Staff in Agricultural Research Sector	1	1	1	1	0	1	1	3	2	2	2	2.25	3	2	3	3	2	2.6	3	3	3	3	3	3	3	3	3	3	5	3.4	4	4	4	4	4	4	4	4	4	4	4	4	4	4	4	4
0	2	Graduate	Staff in Agricultural Research Sector	1	1	1	1	1	1	1	3	3	3	4	3.25	4	3	4	5	2	3.6	4	3	1	3	3	2.8	3	4	3	3	3	3.2	4	4	4	4	4	4	4	4	4	4	4	4	4	4	4	4
1	2	Graduate	Software Professional	1	1	1	1	0	1	0	5	5	5	3	4.5	5	5	5	4	1	4	2	2	3	3	3	2.6	3	4	4	3	3	3.4	4	4	4	4	4	4	4	4	4	4	4	4	4	4	4	4
0	2	PG and Above	Staff in Agricultural Research Sector	1	1	1	1	0	1	1	4	4	4	4	4	4	4	4	3	3	3.6	4	4	4	4	4	4	3	4	4	2	3	3.2	4	4	4	4	4	4	4	4	4	4	4	4	4	4	4	5
1	2	PG and Above	Staff in Agricultural Research Sector	1	1	1	1	1	1	1	3	2	3	3	2.75	2	3	2	3	3	2.6	3	3	3	3	3	3	4	3	3	3	4	3.4	2	2	2	4	2.5	4	4	4	4	4	4	4	2	4	4	4
0	2	PG and Above	Staff in Agricultural Research Sector	1	1	0	1	0	1	1	3	2	4	4	3.25	2	4	3	3	1	2.6	4	3	2	4	5	3.6	4	3	2	2	4	3	4	4	4	4	4	4	4	4	4	4	4	4	4	4	4	4
0	2	PG and Above	Software Professional	1	1	1	1	1	1	1	2	2	4	4	3	1	4	2	1	2	2	3	5	2	4	4	3.6	3	3	3	3	3	3	4	4	4	4	4	4	4	4	4	4	4	4	4	4	4	4
0	2	Plus Two (Intermediate)	Staff in Agricultural Research Sector	1	1	1	1	0	1	1	5	2	3	3	3.25	4	2	4	3	4	3.4	4	2	5	3	3	3.4	4	4	3	3	3	3.4	4	4	4	5	4.25	4	4	4	4	4	4	2	4	4	4	4
0	2	PG and Above	Staff in Agricultural Research Sector	1	1	1	1	1	1	1	4	1	3	2	2.5	2	4	4	3	3	3.2	2	2	2	5	4	3	4	4	2	1	2	2.6	2	2	4	2	2.5	4	4	4	4	4	1	2	2	4	4	4
0	2	PG and Above	Staff in Agricultural Research Sector	1	1	1	1	1	1	1	3	4	5	5	4.25	3	4	3	2	5	3.4	4	3	3	3	3	3.2	4	3	3	3	2	3	2	4	4	4	3.5	2	2	4	5	3.25	5	2	4	1	2	2
0	2	Graduate	Staff in Agricultural Research Sector	1	1	1	1	1	1	1	3	2	3	3	2.75	4	3	3	4	4	3.6	3	3	3	4	3	3.2	2	1	2	4	1	2	4	5	5	5	4.75	5	5	4	4	4.5	5	5	5	4	5	4
1	2	Other	Staff in Agricultural Research Sector	1	1	1	1	1	1	1	3	3	2	4	3	4	2	3	5	3	3.4	3	3	3	3	3	3	5	3	2	2	3	3	4	5	5	5	4.75	5	5	5	4	4.75	4	4	4	5	5	4
1	2	Plus Two (Intermediate)	Software Professional	1	1	1	1	1	1	1	3	2	4	4	3.25	3	2	3	3	3	2.8	4	4	4	3	3	3.6	4	5	3	4	3	3.8	2	4	4	2	3	4	4	4	4	4	4	2	2	4	2	5
0	2	PG and Above	Staff in Agricultural Research Sector	1	1	1	1	1	1	1	3	5	4	3	3.75	4	2	5	4	4	3.8	4	2	4	4	3	3.4	3	2	3	3	2	2.6	4	4	4	4	4	4	4	4	4	4	4	4	4	4	4	4
1	2	Graduate	Staff in Agricultural Research Sector	1	1	1	1	0	1	1	5	4	3	4	4	3	4	2	3	3	3	3	5	4	3	3	3.6	4	4	2	4	5	3.8	4	5	5	4	4.5	4	4	4	4	4	4	4	4	4	4	4
0	2	PG and Above	Staff in Agricultural Research Sector	1	1	1	1	1	1	1	5	5	3	2	3.75	5	3	5	4	4	4.2	4	4	2	4	3	3.4	4	3	3	3	4	3.4	4	4	4	4	4	4	4	4	5	4.25	4	4	4	4	4	4
0	2	Graduate	Software Professional	1	1	1	1	0	1	1	4	4	4	3	3.75	4	4	3	4	4	3.8	4	3	3	4	4	3.6	3	4	3	3	3	3.2	5	4	5	5	4.75	5	5	5	5	5	4	4	4	4	4	5
0	2	Graduate	Staff in Agricultural Research Sector	1	1	1	1	1	1	1	5	3	3	4	3.75	5	5	5	5	5	5	5	4	3	3	2	3.4	4	2	3	2	3	2.8	4	4	5	5	4.5	5	5	5	4	4.75	4	5	5	4	5	4
1	2	Other	Staff in Agricultural Research Sector	1	1	1	1	0	1	1	4	3	4	3	3.5	3	3	3	3	2	2.8	3	3	5	2	3	3.2	3	2	1	2	5	2.6	4	4	5	5	4.5	4	4	4	2	3.5	4	4	4	4	4	4
1	2	Plus Two (Intermediate)	Software Professional	1	1	1	1	1	1	1	4	3	4	3	3.5	4	3	3	3	3	3.2	5	2	4	2	3	3.2	4	2	3	3	2	2.8	4	4	4	5	4.25	5	4	5	4	4.5	4	4	4	4	4	4
1	2	Other	Software Professional	1	1	1	1	1	1	1	3	3	4	3	3.25	4	2	3	4	2	3	3	4	3	3	1	2.8	4	2	2	2	3	2.6	4	4	4	4	4	4	4	4	4	4	4	4	4	4	4	4
1	2	Plus Two (Intermediate)	Staff in Agricultural Research Sector	1	1	1	1	1	1	1	3	4	1	3	2.75	3	2	3	3	3	2.8	3	3	4	3	3	3.2	3	4	3	4	4	3.6	4	5	4	4	4.25	4	4	4	4	4	4	4	4	4	4	4
1	2	Other	Staff in Agricultural Research Sector	1	1	1	1	1	1	1	2	3	3	3	2.75	3	5	3	3	4	3.6	3	3	3	4	3	3.2	4	3	3	2	2	2.8	4	4	4	4	4	4	4	4	4	4	4	4	4	4	4	1
0	2	Other	Staff in Agricultural Research Sector	1	1	1	1	1	1	1	2	3	4	3	3	3	3	4	2	4	3.2	3	3	3	1	2	2.4	4	4	4	3	4	3.8	4	4	4	4	4	4	5	5	5	4.75	4	4	4	4	4	5
1	2	Other	Staff in Agricultural Research Sector	1	1	1	1	0	1	1	2	3	4	4	3.25	3	3	4	3	3	3.2	3	3	3	3	3	3	3	4	3	2	3	3	4	4	4	4	4	4	4	4	4	4	4	4	4	4	4	2
0	2	Other	Staff in Agricultural Research Sector	1	1	1	1	0	1	1	2	3	4	4	3.25	2	3	3	4	3	3	3	3	5	3	3	3.4	3	2	4	4	3	3.2	5	5	5	4	4.75	4	4	4	4	4	4	4	4	4	4	4
1	2	Graduate	Staff in Agricultural Research Sector	1	1	1	1	0	1	1	2	4	3	3	3	3	4	4	3	3	3.4	3	2	4	4	3	3.2	3	3	3	3	3	3	4	4	5	5	4.5	5	5	5	5	5	4	4	4	4	4	4
0	2	Graduate	Staff in Agricultural Research Sector	1	1	1	1	1	1	1	1	4	3	2	2.5	2	4	3	3	3	3	3	3	4	3	2	3	3	3	3	2	4	3	4	4	5	4	4.25	5	5	4	4	4.5	4	4	4	4	4	4
1	2	Other	Staff in Agricultural Research Sector	1	1	1	1	1	1	1	3	3	3	3	3	3	3	2	4	3	3	3	3	3	3	4	3.2	3	4	4	3	2	3.2	4	5	5	5	4.75	5	5	5	2	4.25	4	4	4	5	5	4
0	2	Plus Two (Intermediate)	Staff in Agricultural Research Sector	1	1	1	1	0	1	1	2	4	4	3	3.25	3	3	3	3	4	3.2	3	3	5	3	3	3.4	5	2	4	2	3	3.2	4	5	4	4	4.25	4	4	4	4	4	4	4	4	4	4	4
0	2	Other	Staff in Agricultural Research Sector	1	1	1	1	1	1	1	1	4	4	2	2.75	1	2	3	3	3	2.4	3	3	3	3	4	3.2	4	3	2	2	3	2.8	4	4	4	4	4	4	4	4	4	4	4	4	4	4	4	4
0	2	Other	Staff in Agricultural Research Sector	1	1	1	1	0	1	1	4	4	3	3	3.5	3	2	3	4	3	3	4	4	3	3	3	3.4	3	4	3	1	5	3.2	4	4	4	4	4	4	4	4	4	4	4	4	4	4	4	4
1	2	PG and Above	Staff in Agricultural Research Sector	1	0	1	1	1	1	0	2	2	1	2	1.75	4	1	3	2	3	2.6	2	5	2	2	2	2.6	3	4	2	4	4	3.4	4	4	4	4	4	4	5	5	4	4.5	4	4	4	4	4	4
1	2	Plus Two (Intermediate)	Software Professional	1	1	1	1	1	1	1	3	5	3	2	3.25	2	3	3	3	5	3.2	3	3	3	4	3	3.2	4	4	4	3	2	3.4	4	4	5	4	4.25	4	4	4	4	4	4	4	4	4	4	4
0	2	Plus Two (Intermediate)	Software Professional	1	1	1	1	0	1	1	3	4	5	3	3.75	4	3	4	4	4	3.8	2	3	2	3	3	2.6	2	3	3	2	3	2.6	4	5	5	5	4.75	5	5	5	4	4.75	4	4	4	4	4	4
1	2	Graduate	Software Professional	1	1	0	1	1	1	1	1	3	2	3	2.25	3	2	2	3	3	2.6	2	4	2	2	5	3	2	3	4	2	5	3.2	1	5	5	2	3.25	5	5	5	5	5	4	1	1	2	1	4
0	2	Graduate	Staff in Agricultural Research Sector	1	1	1	1	1	1	1	5	4	4	2	3.75	4	5	4	5	3	4.2	3	3	3	3	3	3	1	1	3	1	3	1.8	4	4	4	4	4	4	4	5	4	4.25	4	4	5	1	2	4
1	2	PG and Above	Staff in Agricultural Research Sector	1	0	1	1	1	1	1	3	4	3	3	3.25	3	4	4	3	3	3.4	3	3	2	2	4	2.8	3	2	5	3	2	3	4	4	4	4	4	4	4	4	4	4	4	4	4	4	4	4
0	2	Graduate	Staff in Agricultural Research Sector	1	1	1	1	1	1	1	3	3	4	3	3.25	3	3	3	4	1	2.8	3	3	1	2	3	2.4	2	4	5	3	2	3.2	4	5	5	5	4.75	5	5	4	4	4.5	4	4	4	4	4	4
0	2	Other	Administrative Staff	1	1	1	1	1	1	0	3	4	2	3	3	2	3	3	3	3	2.8	3	3	3	3	4	3.2	3	2	3	3	4	3	4	4	4	5	4.25	4	4	4	4	4	4	4	4	4	4	4
0	2	Graduate	Staff in Agricultural Research Sector	0	0	1	1	0	1	1	3	3	2	1	2.25	2	5	3	3	3	3.2	4	3	2	4	3	3.2	4	3	3	3	4	3.4	4	4	4	4	4	4	4	5	5	4.5	4	4	4	2	2	4
1	2	Other	Software Professional	1	1	1	1	1	1	1	4	4	2	3	3.25	3	2	2	3	3	2.6	3	4	3	3	4	3.4	2	3	1	1	4	2.2	4	4	4	4	4	4	4	4	4	4	4	4	4	4	4	4
0	2	SSC	Staff in Agricultural Research Sector	0	0	0	1	1	1	1	4	4	2	2	3	2	3	3	4	4	3.2	3	2	2	4	3	2.8	3	2	4	2	1	2.4	4	4	4	4	4	4	4	4	5	4.25	2	2	4	4	2	4
1	2	Graduate	Software Professional	1	1	1	1	0	0	1	2	3	4	3	3	4	4	3	4	3	3.6	2	3	3	3	4	3	3	4	2	4	2	3	4	4	4	4	4	4	5	4	4	4.25	4	4	4	4	2	4
0	2	Plus Two (Intermediate)	Software Professional	0	1	1	1	0	1	0	2	4	3	3	3	2	2	5	2	1	2.4	2	5	2	3	3	3	5	4	2	4	3	3.6	2	4	4	4	3.5	4	4	4	4	4	4	4	4	4	4	4
0	2	Plus Two (Intermediate)	Software Professional	1	1	1	1	1	0	1	4	4	4	4	4	3	4	4	3	5	3.8	3	3	2	2	4	2.8	3	3	4	2	5	3.4	4	4	4	4	4	4	4	4	5	4.25	4	4	4	4	4	2
0	2	Graduate	Software Professional	0	0	1	0	1	1	0	4	3	4	3	3.5	2	3	5	3	5	3.6	2	3	4	2	2	2.6	4	5	3	3	4	3.8	4	4	4	5	4.25	4	5	5	5	4.75	4	4	4	4	4	4
0	2	PG and Above	Staff in Agricultural Research Sector	1	0	0	1	0	0	1	4	3	2	4	3.25	4	3	4	3	1	3	3	2	5	4	5	3.8	4	1	2	2	1	2	2	4	4	4	3.5	4	4	4	4	4	4	4	4	4	4	4
0	2	PG and Above	Software Professional	1	1	1	0	0	1	1	3	3	3	3	3	3	3	4	3	4	3.4	3	3	4	4	4	3.6	3	5	3	3	3	3.4	4	4	4	4	4	4	4	4	5	4.25	4	4	4	4	4	4
0	2	PG and Above	Software Professional	0	0	0	1	1	0	0	2	3	3	3	2.75	2	4	2	2	3	2.6	5	4	5	3	5	4.4	5	4	3	4	2	3.6	4	4	4	5	4.25	4	5	5	5	4.75	4	4	4	4	4	2
0	2	PG and Above	Software Professional	1	1	1	0	0	1	1	5	3	4	4	4	3	2	4	3	2	2.8	3	3	3	3	3	3	4	3	3	3	4	3.4	4	4	4	4	4	4	5	4	4	4.25	4	4	4	2	2	4
0	2	Graduate	Software Professional	0	0	1	1	0	1	0	3	5	2	4	3.5	2	3	2	2	2	2.2	2	5	3	5	2	3.4	3	2	2	3	4	2.8	4	4	5	5	4.5	4	4	4	5	4.25	4	4	4	4	4	4
0	2	Plus Two (Intermediate)	BPO employee	1	0	0	0	1	0	1	3	4	3	2	3	2	3	3	3	3	2.8	2	3	2	3	3	2.6	3	4	2	3	2	2.8	4	4	4	4	4	4	4	4	4	4	4	4	4	4	4	4
0	2	Graduate	Software Professional	1	1	1	1	1	1	1	3	3	4	3	3.25	1	5	4	3	2	3	2	3	4	5	4	3.6	4	4	3	4	3	3.6	4	4	4	4	4	4	4	4	4	4	4	4	4	2	2	4
0	2	Plus Two (Intermediate)	Software Professional	0	0	0	1	0	0	1	1	3	4	2	2.5	4	4	2	1	3	2.8	5	3	2	2	2	2.8	4	3	4	4	1	3.2	4	4	4	4	4	4	4	4	5	4.25	4	4	4	4	4	4
1	2	Plus Two (Intermediate)	Administrative Staff	1	1	1	0	0	1	1	4	4	4	4	4	3	2	3	3	4	3	4	4	3	2	3	3.2	1	3	3	3	3	2.6	4	4	4	4	4	4	4	4	4	4	4	4	4	4	4	4
0	2	PG and Above	Software Professional	1	1	1	1	0	1	0	3	2	3	3	2.75	2	3	4	3	3	3	1	4	5	4	3	3.4	5	3	2	2	2	2.8	4	4	4	4	4	4	4	4	4	4	4	4	4	2	2	4
1	2	Plus Two (Intermediate)	Staff in Agricultural Research Sector	0	1	1	0	0	0	1	2	2	3	4	2.75	2	5	2	4	2	3	5	2	1	4	2	2.8	2	4	5	3	4	3.6	4	5	4	2	3.75	4	4	4	5	4.25	4	4	4	2	2	4
0	2	PG and Above	Staff in Agricultural Research Sector	1	1	1	1	1	1	1	2	1	1	3	1.75	1	3	2	4	4	2.8	3	4	5	4	4	4	2	3	2	2	3	2.4	2	4	4	4	3.5	4	4	4	4	4	4	4	4	2	2	4
1	2	Graduate	Software Professional	0	1	0	1	0	1	1	3	3	2	5	3.25	3	2	3	3	3	2.8	4	2	3	3	3	3	3	2	1	3	3	2.4	4	4	4	4	4	4	4	4	5	4.25	4	4	4	2	2	4
0	2	Graduate	Staff in Agricultural Research Sector	1	1	1	0	1	0	1	4	2	4	5	3.75	3	2	3	4	3	3	4	5	5	3	3	4	3	5	3	3	3	3.4	4	4	4	4	4	4	4	4	4	4	4	4	4	2	2	4
0	2	Plus Two (Intermediate)	Staff in Agricultural Research Sector	0	0	1	1	1	1	1	3	3	2	3	2.75	3	4	3	2	2	2.8	3	3	3	3	4	3.2	3	2	3	4	4	3.2	4	4	4	4	4	4	4	4	4	4	4	4	4	2	4	5
0	2	PG and Above	Staff in Agricultural Research Sector	1	1	1	1	0	0	1	2	4	3	3	3	3	4	2	3	4	3.2	4	5	2	2	2	3	4	2	5	2	3	3.2	4	4	4	4	4	4	4	4	4	4	4	4	4	2	2	4
1	2	Other	Software Professional	1	1	1	0	1	1	1	3	2	3	1	2.25	1	4	3	4	4	3.2	2	2	4	4	3	3	3	2	3	2	2	2.4	4	4	4	4	4	4	4	4	4	4	4	4	4	2	2	4
0	2	Graduate	Staff in Agricultural Research Sector	0	0	1	1	0	0	1	3	3	2	4	3	2	1	2	2	2	1.8	1	3	1	3	2	2	3	4	3	3	3	3.2	4	4	4	4	4	4	5	5	4	4.5	4	4	4	2	2	4
0	2	PG and Above	Staff in Agricultural Research Sector	1	1	1	0	0	1	1	3	3	4	2	3	4	2	1	2	1	2	1	4	3	2	3	2.6	5	2	3	4	4	3.6	4	4	4	4	4	5	4	4	4	4.25	4	4	4	4	4	4
1	2	Other	Staff in Agricultural Research Sector	0	1	1	1	0	1	1	2	5	4	2	3.25	4	3	5	2	5	3.8	3	3	2	4	1	2.6	2	4	2	3	4	3	4	4	4	4	4	4	4	4	4	4	2	4	2	4	4	4
1	2	Graduate	Staff in Agricultural Research Sector	0	1	1	0	0	0	1	3	3	3	4	3.25	2	5	3	1	1	2.4	2	3	2	1	2	2	4	2	2	4	3	3	4	4	4	4	4	4	4	4	4	4	4	4	4	2	2	4
0	2	Plus Two (Intermediate)	Staff in Agricultural Research Sector	1	1	1	1	0	1	0	3	4	5	3	3.75	3	4	3	4	3	3.4	3	2	4	4	3	3.2	3	5	3	2	4	3.4	4	4	4	4	4	4	4	4	4	4	4	4	4	2	2	2
0	2	Plus Two (Intermediate)	Software Professional	1	0	1	1	1	0	1	3	4	1	2	2.5	2	1	3	4	4	2.8	3	3	3	2	3	2.8	4	3	1	4	3	3	4	4	4	4	4	4	4	4	4	4	4	4	4	4	4	4
0	2	Graduate	Staff in Agricultural Research Sector	1	1	1	0	0	0	1	2	3	5	3	3.25	3	3	4	3	3	3.2	3	4	4	4	3	3.6	2	4	4	3	2	3	4	4	4	4	4	4	4	4	5	4.25	4	2	4	2	2	2
1	2	Other	Staff in Agricultural Research Sector	0	0	0	1	0	1	1	3	5	4	3	3.75	4	2	4	2	1	2.6	1	2	3	1	2	1.8	5	4	4	3	4	4	4	4	4	4	4	4	5	4	4	4.25	4	4	4	4	4	4
1	2	Plus Two (Intermediate)	Staff in Agricultural Research Sector	1	1	1	0	0	1	1	3	4	3	3	3.25	3	4	4	5	3	3.8	5	3	3	1	2	2.8	2	2	3	1	2	2	4	5	5	4	4.5	5	4	5	4	4.5	4	4	4	4	4	4
1	2	Graduate	Software Professional	0	1	1	0	0	1	0	3	3	2	2	2.5	3	4	3	2	2	2.8	2	2	1	3	2	2	3	5	4	3	2	3.4	4	4	4	4	4	4	5	4	4	4.25	4	4	4	4	4	4
0	2	PG and Above	Staff in Agricultural Research Sector	0	1	1	1	0	0	1	2	3	4	2	2.75	3	2	2	2	3	2.4	3	3	4	5	1	3.2	3	1	5	2	2	2.6	5	5	4	4	4.5	5	5	4	4	4.5	4	4	5	4	4	4
1	2	Other	Staff in Agricultural Research Sector	1	1	1	1	0	1	1	4	4	4	3	3.75	4	3	2	3	4	3.2	4	5	3	3	3	3.6	5	2	2	3	4	3.2	4	5	4	4	4.25	4	4	4	4	4	4	5	2	4	4	2
0	2	Other	Software Professional	0	1	0	1	1	0	0	3	4	3	4	3.5	4	1	2	3	3	2.6	2	2	2	3	3	2.4	5	2	2	2	3	2.8	4	4	4	4	4	4	4	5	4	4.25	4	4	5	4	4	2
1	2	Other	Software Professional	1	1	1	0	0	0	1	3	1	3	3	2.5	3	3	3	4	5	3.6	3	3	3	3	4	3.2	4	5	4	3	3	3.8	4	4	4	4	4	4	4	5	5	4.5	4	4	4	2	4	4
1	2	PG and Above	Staff in Agricultural Research Sector	0	0	1	1	1	1	1	3	5	3	2	3.25	2	2	2	4	2	2.4	3	2	2	2	2	2.2	2	3	2	2	2	2.2	4	4	5	4	4.25	4	4	4	4	4	2	4	5	4	4	2
0	2	PG and Above	Staff in Agricultural Research Sector	1	1	0	0	0	0	1	3	2	4	5	3.5	3	4	5	4	4	4	3	3	5	3	2	3.2	3	5	3	3	2	3.2	4	4	4	4	4	4	4	4	4	4	2	2	4	2	4	4
1	2	Graduate	Staff in Agricultural Research Sector	1	1	1	0	1	1	0	5	2	3	2	3	2	3	2	3	1	2.2	2	2	3	4	3	2.8	2	2	3	4	3	2.8	4	4	4	4	4	4	4	4	4	4	4	4	4	4	4	4
0	2	Plus Two (Intermediate)	Staff in Agricultural Research Sector	1	1	1	1	1	0	0	3	3	2	1	2.25	3	3	4	2	3	3	3	2	3	3	2	2.6	4	3	3	5	2	3.4	4	4	4	5	4.25	4	4	4	4	4	4	4	4	4	4	4
0	2	PG and Above	Staff in Agricultural Research Sector	1	1	1	0	1	1	0	4	3	5	3	3.75	3	3	4	3	2	3	3	3	3	3	4	3.2	4	5	3	3	2	3.4	2	4	4	4	3.5	4	5	4	4	4.25	4	4	4	2	2	4
0	2	PG and Above	Staff in Agricultural Research Sector	1	0	0	1	1	1	1	2	3	2	3	2.5	4	4	3	2	1	2.8	2	5	4	2	2	3	2	4	1	2	3	2.4	4	4	4	4	4	4	4	4	4	4	2	2	4	4	4	4
0	2	SSC	Staff in Agricultural Research Sector	1	1	0	0	1	1	1	4	4	2	5	3.75	2	3	2	4	3	2.8	2	4	4	2	2	2.8	4	3	2	3	4	3.2	4	4	4	4	4	4	4	4	4	4	4	2	4	4	2	4
1	2	Plus Two (Intermediate)	Staff in Agricultural Research Sector	0	0	0	1	1	1	1	5	3	2	3	3.25	2	2	5	3	2	2.8	3	2	3	3	1	2.4	4	4	3	2	2	3	4	4	4	4	4	4	5	4	4	4.25	4	4	4	4	4	4
1	2	Plus Two (Intermediate)	Staff in Agricultural Research Sector	1	1	1	1	1	1	1	3	3	4	3	3.25	3	3	5	1	3	3	1	4	3	2	3	2.6	4	4	4	3	3	3.6	2	4	4	4	3.5	4	4	4	4	4	2	4	4	2	2	4
0	2	Plus Two (Intermediate)	Staff in Agricultural Research Sector	0	1	1	1	1	1	1	3	5	2	3	3.25	4	4	3	2	2	3	2	4	4	3	3	3.2	2	2	3	2	3	2.4	2	4	4	4	3.5	4	4	4	4	4	4	4	4	4	2	4
0	2	Plus Two (Intermediate)	Staff in Agricultural Research Sector	1	1	1	1	1	0	1	4	2	4	2	3	3	4	4	1	3	3	2	2	2	3	5	2.8	3	4	3	3	4	3.4	4	4	4	4	4	4	4	4	4	4	4	4	4	2	2	4
1	2	PG and Above	Staff in Agricultural Research Sector	0	1	1	1	1	1	1	3	4	2	2	2.75	4	3	5	2	4	3.6	2	3	2	3	2	2.4	1	1	1	1	1	1	4	4	4	5	4.25	4	4	4	4	4	4	4	4	2	2	4
0	2	Plus Two (Intermediate)	Software Professional	1	1	1	1	1	0	1	3	3	5	3	3.5	2	4	4	5	3	3.6	5	2	3	4	1	3	3	3	2	3	3	2.8	4	4	4	4	4	4	4	4	4	4	4	4	4	4	2	4
0	2	Graduate	Software Professional	1	1	1	0	1	1	1	5	4	3	1	3.25	4	3	2	1	3	2.6	2	2	4	3	3	2.8	2	5	2	2	2	2.6	4	4	4	4	4	5	4	5	4	4.5	4	4	4	4	4	4
1	2	Plus Two (Intermediate)	Software Professional	1	1	1	1	1	0	1	3	2	4	4	3.25	3	2	4	4	2	3	2	4	4	2	2	2.8	1	4	4	2	4	3	2	4	4	5	3.75	4	4	4	4	4	4	4	4	4	4	4
0	2	PG and Above	Staff in Agricultural Research Sector	1	1	1	0	1	1	0	4	5	4	4	4.25	3	4	4	3	5	3.8	5	3	3	3	4	3.6	5	5	5	4	5	4.8	4	5	5	4	4.5	4	5	4	5	4.5	4	4	4	4	4	2
1	2	Graduate	Staff in Agricultural Research Sector	1	1	1	1	1	1	0	3	2	2	3	2.5	1	2	5	2	2	2.4	2	3	2	2	4	2.6	4	4	4	4	5	4.2	4	4	4	4	4	5	4	4	4	4.25	2	4	4	4	4	5
1	2	PG and Above	Staff in Agricultural Research Sector	0	0	1	0	1	1	0	2	3	5	4	3.5	3	2	2	3	2	2.4	3	3	2	2	1	2.2	4	4	2	2	4	3.2	4	4	4	4	4	4	4	4	4	4	4	4	2	2	4	4
1	2	Graduate	Administrative Staff	0	0	0	1	1	1	1	3	3	1	5	3	2	2	2	2	2	2	2	1	1	3	4	2.2	4	4	4	4	4	4	4	4	4	4	4	4	4	4	4	4	4	4	4	2	4	4
1	2	PG and Above	Staff in Agricultural Research Sector	0	1	0	1	1	1	0	3	5	2	2	3	3	4	4	3	2	3.2	1	5	2	5	3	3.2	4	4	4	4	5	4.2	4	4	5	4	4.25	4	4	5	5	4.5	4	4	4	4	4	2
1	2	Graduate	Software Professional	1	0	0	1	1	0	1	3	5	2	2	3	2	3	2	3	3	2.6	2	2	4	4	2	2.8	4	4	4	4	4	4	4	4	4	4	4	4	4	4	5	4.25	4	4	4	4	4	5
0	2	Graduate	Staff in Agricultural Research Sector	1	1	1	1	1	0	1	4	4	5	4	4.25	3	3	3	2	3	2.8	2	4	3	2	3	2.8	5	4	4	5	4	4.4	4	4	4	4	4	4	4	4	4	4	2	4	4	2	4	4
1	2	Plus Two (Intermediate)	Software Professional	0	1	0	1	1	0	1	3	2	3	2	2.5	2	2	3	3	3	2.6	4	4	3	2	2	3	4	4	5	4	4	4.2	4	4	4	4	4	4	4	4	4	4	4	4	4	2	4	4
0	2	Other	Software Professional	1	1	1	0	1	1	1	3	3	5	3	3.5	3	2	2	1	4	2.4	2	3	2	3	4	2.8	4	4	4	4	4	4	4	5	5	5	4.75	4	4	4	4	4	4	4	5	4	4	4
1	2	PG and Above	Software Professional	0	0	1	0	1	1	0	5	2	2	3	3	4	3	3	3	2	3	4	2	5	3	3	3.4	4	4	4	4	4	4	4	4	4	4	4	4	4	4	4	4	4	4	4	4	4	4
0	2	Graduate	Software Professional	1	1	1	0	1	0	1	3	4	3	3	3.25	5	2	2	2	3	2.8	4	5	3	2	3	3.4	4	4	4	4	4	4	4	4	4	4	4	4	4	4	4	4	4	4	4	4	4	4
0	2	Graduate	Staff in Agricultural Research Sector	1	1	1	1	1	1	0	4	4	5	3	4	3	2	3	2	1	2.2	1	2	4	5	1	2.6	4	4	4	4	5	4.2	4	4	4	4	4	4	4	4	4	4	4	4	4	4	4	4
1	2	Graduate	Software Professional	0	0	0	1	1	0	1	2	2	4	1	2.25	2	3	1	1	2	1.8	2	1	2	1	2	1.6	4	4	4	4	4	4	4	4	4	4	4	4	4	4	4	4	4	4	4	4	4	5
1	2	Graduate	Software Professional	1	1	1	0	1	1	1	3	4	3	2	3	3	4	3	2	4	3.2	3	4	5	3	4	3.8	5	4	4	4	4	4.2	2	2	2	4	2.5	4	4	4	4	4	4	4	2	4	4	4
1	2	Other	Software Professional	1	0	0	1	1	1	1	3	4	4	3	3.5	2	2	4	4	2	2.8	1	2	2	4	2	2.2	4	4	4	4	4	4	4	4	4	4	4	4	4	4	4	4	4	4	4	4	4	4
1	2	PG and Above	Software Professional	1	1	1	0	1	0	0	3	4	4	4	3.75	3	3	2	3	3	2.8	2	4	3	4	5	3.6	5	4	4	5	5	4.6	4	4	4	4	4	4	4	4	4	4	4	4	4	4	4	4
0	2	Other	BPO employee	1	1	1	1	1	1	1	2	2	2	3	2.25	2	3	3	5	2	3	4	3	3	2	3	3	4	4	4	4	4	4	4	4	4	5	4.25	4	4	4	4	4	4	2	4	4	4	4
0	2	Graduate	Software Professional	1	1	1	1	1	1	1	3	3	4	3	3.25	3	4	4	3	4	3.6	5	4	3	3	2	3.4	4	4	4	4	4	4	2	2	4	2	2.5	4	4	4	4	4	1	2	2	4	4	4
1	2	Other	Software Professional	0	1	0	0	1	1	1	1	1	1	1	1	1	1	2	1	4	1.8	3	3	1	2	1	2	4	4	4	4	5	4.2	2	4	4	4	3.5	2	2	4	5	3.25	5	2	4	1	2	2
2	2	Other	Administrative Staff	1	1	1	1	1	1	1	4	3	3	2	3	3	3	3	3	2	2.8	3	4	4	4	5	4	4	4	4	4	5	4.2	4	5	5	5	4.75	5	5	4	4	4.5	5	5	5	4	5	4
1	2	PG and Above	Software Professional	1	1	1	1	1	1	1	2	2	5	2	2.75	2	2	4	2	4	2.8	4	4	4	1	2	3	4	5	4	4	4	4.2	4	5	5	5	4.75	5	5	5	4	4.75	4	4	4	5	5	4
0	2	Graduate	Staff in Agricultural Research Sector	0	1	1	1	1	0	1	5	1	4	4	3.5	2	4	4	4	2	3.2	2	4	5	5	2	3.6	4	4	4	4	4	4	2	4	4	2	3	4	4	4	4	4	4	2	2	4	2	5
1	2	PG and Above	Staff in Agricultural Research Sector	0	1	1	1	1	1	1	4	5	5	5	4.75	4	5	5	5	5	4.8	5	4	4	5	5	4.6	4	5	4	4	4	4.2	4	4	4	4	4	4	4	4	4	4	4	4	4	4	4	4
0	2	PG and Above	Software Professional	1	1	1	1	1	1	1	4	4	4	4	4	4	5	5	5	5	4.8	5	5	4	4	4	4.4	4	4	4	4	4	4	4	5	5	4	4.5	4	4	4	4	4	4	4	4	4	4	4
1	2	Graduate	Staff in Agricultural Research Sector	1	1	1	0	1	0	1	4	4	4	2	3.5	2	4	4	2	4	3.2	4	4	4	4	2	3.6	4	5	4	4	5	4.4	4	4	4	4	4	4	4	4	5	4.25	4	4	4	4	4	5
1	2	PG and Above	Staff in Agricultural Research Sector	0	1	1	1	1	0	1	4	4	4	4	4	4	4	4	4	4	4	4	4	4	4	4	4	1	4	1	1	5	2.4	5	4	5	5	4.75	5	5	5	5	5	4	4	4	4	4	4
1	2	PG and Above	Staff in Agricultural Research Sector	0	1	1	1	1	1	1	4	4	4	4	4	4	5	5	4	4	4.4	4	4	4	4	4	4	4	4	5	4	4	4.2	4	4	5	5	4.5	5	5	5	4	4.75	4	5	5	4	5	4
1	2	PG and Above	Software Professional	1	1	1	0	1	1	1	4	4	4	4	4	4	4	4	4	4	4	4	4	5	4	4	4.2	4	4	4	4	4	4	4	4	5	5	4.5	4	4	4	2	3.5	4	4	4	4	4	4
0	2	PG and Above	Staff in Agricultural Research Sector	0	1	1	0	1	0	1	5	5	4	4	4.5	5	4	5	5	5	4.8	5	5	5	4	4	4.6	4	4	4	4	5	4.2	4	4	4	5	4.25	5	4	5	4	4.5	4	4	4	4	4	4
0	2	PG and Above	Staff in Agricultural Research Sector	0	1	1	1	1	0	1	4	4	4	5	4.25	4	4	5	5	5	4.6	5	5	4	4	5	4.6	4	4	4	4	4	4	4	4	4	4	4	4	4	4	4	4	4	4	4	4	4	4
0	2	Graduate	Staff in Agricultural Research Sector	1	1	1	1	1	1	1	4	4	4	4	4	4	4	5	5	4	4.4	4	4	2	4	4	3.6	4	4	4	4	4	4	4	5	4	4	4.25	4	4	4	4	4	4	4	4	4	4	4
1	2	PG and Above	Staff in Agricultural Research Sector	1	1	1	0	1	0	1	4	4	4	4	4	4	4	4	5	5	4.4	4	5	4	4	4	4.2	4	4	4	4	4	4	4	4	4	4	4	4	4	4	4	4	4	4	4	4	4	4
0	2	PG and Above	Staff in Agricultural Research Sector	0	1	1	0	1	0	1	4	4	4	4	4	4	4	4	4	4	4	4	4	4	4	4	4	4	4	4	4	4	4	4	4	4	4	4	4	5	5	5	4.75	4	4	4	4	4	4
0	2	Graduate	Software Professional	0	1	1	1	1	1	1	4	4	4	4	4	4	5	4	4	4	4.2	4	4	4	4	4	4	4	4	4	4	4	4	4	4	4	4	4	4	4	4	4	4	4	4	4	4	4	4
1	2	PG and Above	Staff in Agricultural Research Sector	0	1	1	0	1	1	1	2	4	4	4	3.5	4	4	4	4	4	4	4	4	4	4	4	4	4	4	4	2	4	3.6	5	5	5	4	4.75	4	4	4	4	4	4	4	4	4	4	4
1	2	PG and Above	Staff in Agricultural Research Sector	0	1	1	0	1	0	1	4	5	4	4	4.25	4	4	4	4	4	4	5	5	5	4	4	4.6	4	4	4	4	4	4	4	4	5	5	4.5	5	5	5	5	5	4	4	4	4	4	4
1	2	PG and Above	Staff in Agricultural Research Sector	1	1	1	1	1	0	1	4	4	4	4	4	4	4	4	4	4	4	4	4	4	4	4	4	4	5	4	4	4	4.2	4	4	5	4	4.25	5	5	4	4	4.5	4	4	4	4	4	5
0	2	Graduate	Software Professional	0	1	1	1	1	0	1	5	5	4	4	4.5	5	5	5	4	4	4.6	4	4	4	4	4	4	4	4	4	4	4	4	5	5	4	4	4.5	5	5	4	4	4.5	4	4	5	4	4	4
0	2	Graduate	Staff in Agricultural Research Sector	1	1	1	0	1	0	1	4	4	4	4	4	4	4	5	5	5	4.6	5	5	5	4	4	4.6	4	4	4	4	4	4	4	5	4	4	4.25	4	4	4	4	4	4	5	2	4	4	4
1	2	Plus Two (Intermediate)	Staff in Agricultural Research Sector	1	1	1	0	1	1	1	4	4	4	4	4	4	4	5	4	5	4.4	5	4	4	4	4	4.2	4	4	4	4	4	4	4	4	4	4	4	4	4	5	4	4.25	4	4	5	4	4	4
0	2	Graduate	Software Professional	0	1	1	0	1	0	1	4	4	4	4	4	4	5	5	5	5	4.8	5	5	2	4	4	4	4	4	4	4	4	4	4	4	4	4	4	4	4	5	5	4.5	4	4	4	2	4	4
0	2	PG and Above	Software Professional	1	1	1	0	1	1	1	5	4	4	4	4.25	4	5	4	4	4	4.2	4	4	4	4	4	4	4	4	4	4	4	4	4	4	5	4	4.25	4	4	4	4	4	2	4	5	4	4	4
1	2	PG and Above	Staff in Agricultural Research Sector	0	1	1	1	1	1	1	4	4	5	4	4.25	4	4	4	4	4	4	4	4	4	4	4	4	4	5	4	4	4	4.2	4	4	4	4	4	4	4	4	4	4	2	2	4	2	4	2
0	2	PG and Above	Staff in Agricultural Research Sector	0	1	1	0	1	0	1	4	4	4	4	4	4	4	4	4	4	4	4	4	4	4	4	4	4	4	4	4	4	4	4	4	4	4	4	4	4	4	4	4	4	4	4	4	4	4
0	2	PG and Above	Staff in Agricultural Research Sector	0	1	1	1	1	1	1	4	4	5	4	4.25	4	4	4	4	4	4	5	5	4	4	4	4.4	4	4	4	4	5	4.2	4	4	4	5	4.25	4	4	4	4	4	4	4	4	4	4	4
0	2	PG and Above	Staff in Agricultural Research Sector	0	1	1	1	1	0	1	4	4	4	4	4	4	4	5	4	4	4.2	4	4	4	4	4	4	2	1	4	2	4	2.6	2	4	4	4	3.5	4	5	4	4	4.25	4	4	4	2	2	5
1	2	Graduate	Staff in Agricultural Research Sector	0	1	1	0	1	0	1	4	4	5	4	4.25	4	5	5	5	5	4.8	5	5	4	4	4	4.4	4	4	4	4	4	4	4	4	4	4	4	4	4	4	4	4	2	2	4	4	4	4
0	2	PG and Above	Staff in Agricultural Research Sector	1	1	1	1	1	0	1	1	1	4	1	1.75	1	5	5	2	5	3.6	5	5	5	4	1	4	4	2	4	4	4	3.6	4	4	4	4	4	4	4	4	4	4	4	2	4	4	2	4
0	2	PG and Above	Staff in Agricultural Research Sector	0	1	1	0	1	0	1	5	4	4	5	4.5	4	4	4	4	4	4	4	5	4	4	4	4.2	4	4	4	4	4	4	4	4	4	4	4	4	5	4	4	4.25	4	4	4	4	4	5
0	2	PG and Above	Staff in Agricultural Research Sector	0	1	1	0	1	0	1	2	4	4	4	3.5	4	4	4	4	4	4	4	4	4	4	4	4	4	2	4	4	4	3.6	2	4	4	4	3.5	4	4	4	4	4	2	4	4	2	2	4
1	2	Other	Staff in Agricultural Research Sector	0	1	1	0	1	1	1	4	4	4	4	4	4	5	5	5	5	4.8	5	4	4	4	4	4.2	4	4	4	4	4	4	2	4	4	4	3.5	4	4	4	4	4	4	4	4	4	2	4
0	2	PG and Above	Staff in Agricultural Research Sector	0	1	1	0	1	0	1	4	4	4	4	4	4	4	4	5	4	4.2	4	4	4	4	4	4	4	4	4	4	4	4	4	4	4	4	4	4	4	4	4	4	4	4	4	2	2	4
0	2	Graduate	Staff in Agricultural Research Sector	0	1	1	0	1	0	1	4	4	4	4	4	4	4	4	4	4	4	4	5	5	4	4	4.4	4	4	4	4	4	4	4	4	4	5	4.25	4	4	4	4	4	4	4	4	2	2	4
0	2	PG and Above	Staff in Agricultural Research Sector	0	1	1	1	1	0	1	4	4	4	4	4	4	4	4	4	4	4	4	4	4	4	4	4	4	5	2	4	4	3.8	4	4	4	4	4	4	4	4	4	4	4	4	4	4	2	4
1	2	Graduate	Software Professional	1	1	1	0	1	0	1	4	4	4	4	4	4	4	4	4	4	4	4	4	5	2	2	3.4	4	4	4	4	4	4	4	4	4	4	4	5	4	5	4	4.5	4	4	4	4	4	4
1	2	PG and Above	Software Professional	0	1	1	0	1	0	1	4	4	4	4	4	4	4	4	4	4	4	5	4	4	4	4	4.2	4	4	4	4	4	4	2	4	4	5	3.75	4	4	4	4	4	4	4	4	4	4	2
0	2	Graduate	Software Professional	1	1	1	0	1	0	1	4	4	4	4	4	2	4	4	4	4	3.6	4	4	4	4	4	4	4	4	4	4	4	4	4	5	5	4	4.5	4	5	4	5	4.5	4	4	4	4	4	4
0	2	Graduate	Staff in Agricultural Research Sector	0	1	1	0	1	1	1	4	4	4	4	4	4	4	4	4	4	4	4	4	5	4	4	4.2	4	4	4	4	4	4	4	4	4	4	4	5	4	4	4	4.25	2	4	4	4	4	2
0	2	PG and Above	Staff in Agricultural Research Sector	0	1	1	0	1	0	1	4	4	5	4	4.25	4	4	4	5	4	4.2	5	5	5	4	4	4.6	4	4	4	4	4	4	4	4	4	4	4	4	4	4	4	4	4	4	2	2	4	4
0	2	Graduate	Staff in Agricultural Research Sector	0	1	1	0	1	1	1	4	4	4	4	4	4	4	4	4	4	4	5	4	4	4	4	4.2	4	5	4	4	5	4.4	4	4	4	4	4	4	4	4	4	4	4	4	4	2	4	4
1	2	Other	Administrative Staff	0	1	1	1	1	0	1	4	4	4	4	4	4	4	5	5	4	4.4	4	4	5	4	4	4.2	4	4	4	4	4	4	4	4	5	4	4.25	4	4	5	5	4.5	4	4	4	4	4	4
1	2	PG and Above	Staff in Agricultural Research Sector	0	1	1	0	1	1	1	4	4	4	4	4	4	4	4	4	4	4	4	4	4	4	4	4	5	4	5	5	5	4.8	4	4	4	4	4	4	4	4	5	4.25	4	4	4	4	4	4
1	2	Graduate	Software Professional	0	1	1	1	1	1	1	4	4	4	4	4	4	4	4	4	4	4	4	4	4	4	4	4	4	4	2	4	5	3.8	4	4	4	4	4	4	4	4	4	4	2	4	4	2	4	2
0	2	Graduate	Staff in Agricultural Research Sector	0	1	1	0	0	1	1	4	4	4	4	4	4	4	4	4	4	4	4	4	5	4	4	4.2	5	4	5	4	4	4.4	4	4	4	4	4	4	4	4	4	4	4	4	4	2	4	2
0	2	Graduate	Software Professional	0	1	1	0	1	1	1	4	4	5	4	4.25	4	4	4	4	4	4	4	4	4	4	4	4	4	4	4	4	4	4	4	5	5	5	4.75	4	4	4	4	4	4	4	5	4	4	4
1	2	Graduate	Software Professional	0	1	1	0	0	1	1	4	4	4	4	4	4	4	4	4	4	4	4	4	4	4	4	4	4	4	5	4	4	4.2	4	4	4	4	4	4	4	4	4	4	4	4	4	4	4	4
1	2	Graduate	Software Professional	0	1	1	1	1	1	1	4	4	4	4	4	4	5	4	2	4	3.8	4	4	5	4	4	4.2	4	4	4	4	4	4	4	4	4	4	4	4	4	4	4	4	4	4	4	4	4	4
1	2	PG and Above	Software Professional	0	1	1	0	0	1	1	2	2	1	4	2.25	2	4	4	4	4	3.6	4	4	4	4	4	4	4	4	4	4	4	4	4	4	4	4	4	4	4	4	4	4	4	4	4	4	4	4
1	2	PG and Above	Staff in Agricultural Research Sector	0	1	1	1	1	1	1	4	4	4	4	4	4	4	4	4	4	4	4	4	5	4	4	4.2	2	4	4	4	4	3.6	4	4	4	4	4	4	4	4	4	4	4	4	4	4	4	4
1	2	Graduate	Software Professional	0	1	1	1	0	1	1	4	4	2	4	3.5	4	4	4	4	4	4	4	4	4	4	4	4	2	5	4	2	4	3.4	2	2	2	4	2.5	4	4	4	4	4	4	4	2	4	4	4
1	2	Graduate	Software Professional	0	1	1	1	1	1	1	4	4	4	4	4	4	4	4	4	4	4	4	4	4	4	4	4	2	5	4	4	4	3.8	4	4	4	4	4	4	4	4	4	4	4	4	4	4	4	4
1	3	Graduate	Software Professional	0	1	1	1	1	1	1	2	4	2	4	3	4	4	4	4	4	4	4	4	4	4	4	4	4	4	4	4	4	4	4	4	4	4	4	4	4	4	4	4	4	4	4	4	4	4
0	3	PG and Above	Software Professional	0	1	1	1	0	1	1	4	4	4	4	4	4	4	4	4	4	4	4	4	4	4	4	4	4	1	4	4	4	3.4	4	4	4	5	4.25	4	4	4	4	4	4	2	4	4	4	4
0	3	Graduate	BPO employee	1	1	1	0	1	1	1	4	4	4	4	4	4	4	4	4	4	4	5	5	4	4	4	4.4	4	4	4	2	4	3.6	2	2	4	2	2.5	4	4	4	4	4	1	2	2	4	4	2
1	3	Graduate	Software Professional	1	1	1	1	0	1	1	4	4	4	4	4	4	4	4	4	5	4.2	4	4	4	4	4	4	4	4	4	2	4	3.6	2	4	4	4	3.5	2	2	4	5	3.25	5	2	4	1	2	2
1	3	Graduate	Software Professional	0	1	1	1	1	1	1	4	4	5	2	3.75	4	4	4	4	4	4	4	4	4	2	4	3.6	2	5	4	4	4	3.8	4	5	5	5	4.75	5	5	4	4	4.5	5	5	5	4	5	4
0	3	Graduate	Administrative Staff	1	1	1	0	1	1	1	4	4	4	4	4	4	4	4	4	4	4	4	4	4	4	4	4	2	4	4	4	4	3.6	4	5	5	5	4.75	5	5	5	4	4.75	4	4	4	5	5	5
0	3	PG and Above	Software Professional	0	1	1	1	0	1	1	4	4	4	4	4	4	4	4	4	4	4	4	4	4	4	4	4	4	4	4	4	4	4	2	4	4	2	3	4	4	4	4	4	4	2	2	4	2	2
1	3	Graduate	Staff in Agricultural Research Sector	0	1	1	0	1	1	1	4	4	4	4	4	4	4	4	4	4	4	4	4	4	4	4	4	4	4	4	4	4	4	4	4	4	4	4	4	4	4	4	4	4	4	4	4	4	4
1	3	Graduate	Staff in Agricultural Research Sector	1	1	1	1	1	1	1	4	4	4	4	4	4	4	4	4	4	4	4	4	5	4	2	3.8	4	4	4	2	4	3.6	4	5	5	4	4.5	4	4	4	4	4	4	4	4	4	4	4
0	3	PG and Above	Software Professional	1	1	1	0	0	1	1	4	4	4	4	4	4	4	4	4	4	4	5	4	4	4	4	4.2	4	5	4	4	5	4.4	4	4	4	4	4	4	4	4	5	4.25	4	4	4	4	4	4
0	3	PG and Above	Staff in Agricultural Research Sector	1	1	1	1	1	1	1	4	4	5	4	4.25	4	5	5	4	5	4.6	4	5	4	4	4	4.2	4	4	4	4	4	4	5	4	5	5	4.75	5	5	5	5	5	4	4	4	4	4	4
1	3	PG and Above	Staff in Agricultural Research Sector	0	1	1	0	0	1	1	4	4	4	4	4	4	4	4	4	4	4	5	4	4	4	4	4.2	4	4	2	4	4	3.6	4	4	5	5	4.5	5	5	5	4	4.75	4	5	5	4	5	4
1	3	PG and Above	Staff in Agricultural Research Sector	0	1	1	1	1	1	1	5	5	4	5	4.75	5	5	4	4	5	4.6	5	4	4	4	4	4.2	4	5	4	4	4	4.2	4	4	5	5	4.5	4	4	4	2	3.5	4	4	4	4	4	4
1	3	PG and Above	Software Professional	0	1	1	1	0	1	1	4	4	4	2	3.5	4	5	4	4	4	4.2	4	4	4	4	5	4.2	4	4	4	4	4	4	4	4	4	5	4.25	5	4	5	4	4.5	4	4	4	4	4	4
0	3	Graduate	Staff in Agricultural Research Sector	0	1	1	0	1	1	1	4	5	4	5	4.5	4	4	4	4	4	4	4	5	4	4	4	4.2	4	4	4	4	4	4	4	4	4	4	4	4	4	4	4	4	4	4	4	4	4	4
0	3	Plus Two (Intermediate)	Staff in Agricultural Research Sector	0	1	1	1	1	1	1	4	4	4	4	4	4	4	4	4	4	4	4	5	5	4	4	4.4	4	5	4	4	4	4.2	4	5	4	4	4.25	4	4	4	4	4	4	4	4	4	4	4
1	3	Graduate	Staff in Agricultural Research Sector	0	1	1	0	0	1	1	4	4	4	5	4.25	4	4	5	4	4	4.2	4	4	4	2	4	3.6	4	4	4	4	4	4	4	4	4	4	4	4	4	4	4	4	4	4	4	4	4	4
0	3	PG and Above	Staff in Agricultural Research Sector	1	1	1	1	1	1	1	4	4	4	4	4	4	4	4	4	4	4	4	4	4	2	2	3.2	4	4	5	4	5	4.4	4	4	4	4	4	4	5	5	5	4.75	4	4	4	4	4	4
1	3	PG and Above	Staff in Agricultural Research Sector	0	1	1	0	0	1	1	4	4	4	4	4	4	4	4	4	4	4	4	4	4	4	4	4	4	4	4	4	4	4	4	4	4	4	4	4	4	4	4	4	4	4	4	4	4	4
1	3	Other	Software Professional	0	1	1	1	0	1	1	2	2	4	4	3	4	4	4	5	4	4.2	4	4	4	4	4	4	4	4	4	4	4	4	5	5	5	4	4.75	4	4	4	4	4	4	4	4	4	4	4
0	3	PG and Above	Staff in Agricultural Research Sector	1	1	1	1	1	1	1	4	2	5	4	3.75	2	4	4	4	4	3.6	5	4	4	4	4	4.2	4	4	4	4	4	4	4	4	5	5	4.5	5	5	5	5	5	4	4	4	4	4	4
0	3	PG and Above	Staff in Agricultural Research Sector	0	1	1	1	1	1	1	2	2	5	4	3.25	4	4	4	4	4	4	4	4	4	2	2	3.2	4	4	4	4	4	4	4	4	5	4	4.25	5	5	4	4	4.5	4	4	4	4	4	4
1	3	Graduate	Staff in Agricultural Research Sector	1	1	1	0	1	1	0	4	4	4	4	4	4	4	4	4	4	4	4	4	4	4	2	3.6	4	4	2	2	2	2.8	4	5	5	5	4.75	4	4	4	4	4	4	4	5	4	4	4
0	3	SSC	Software Professional	0	1	1	1	0	1	1	4	4	1	4	3.25	4	4	4	4	4	4	5	4	4	4	4	4.2	5	4	4	4	4	4.2	4	4	4	4	4	4	4	4	4	4	4	4	4	4	4	4
1	3	Plus Two (Intermediate)	Staff in Agricultural Research Sector	0	1	1	0	1	1	0	4	4	4	4	4	2	4	4	4	4	3.6	4	4	4	2	4	3.6	4	4	4	4	4	4	4	4	4	4	4	4	4	4	4	4	4	4	4	4	4	4
1	3	PG and Above	Staff in Agricultural Research Sector	1	0	0	1	0	1	1	4	4	4	4	4	2	4	4	4	4	3.6	4	4	4	4	4	4	4	4	4	4	4	4	4	4	4	4	4	4	4	4	4	4	4	4	4	4	4	4
1	3	Graduate	Software Professional	0	1	1	1	0	1	0	2	2	5	4	3.25	4	4	4	4	4	4	4	4	4	4	4	4	2	4	2	2	2	2.4	4	4	4	4	4	4	4	4	4	4	4	4	4	4	4	4
1	3	PG and Above	Software Professional	0	0	0	1	1	1	1	2	2	4	4	3	4	4	4	5	4	4.2	4	4	4	4	4	4	1	4	4	2	4	3	2	2	2	4	2.5	4	4	4	4	4	4	4	2	4	4	4
1	3	PG and Above	Staff in Agricultural Research Sector	1	1	1	1	0	1	0	4	4	4	4	4	4	4	4	4	4	4	4	4	4	4	4	4	5	4	5	4	5	4.6	4	4	4	4	4	4	4	4	4	4	4	4	4	4	4	4
0	3	Plus Two (Intermediate)	Staff in Agricultural Research Sector	1	0	0	0	1	1	1	2	4	4	4	3.5	4	4	4	4	5	4.2	4	5	4	4	4	4.2	4	5	4	4	5	4.4	4	4	4	4	4	4	4	4	4	4	4	4	4	4	4	4
1	3	PG and Above	Staff in Agricultural Research Sector	0	1	1	0	0	1	1	4	4	4	4	4	2	4	4	5	4	3.8	4	4	4	4	4	4	4	4	2	2	4	3.2	4	4	4	5	4.25	4	4	4	4	4	4	2	4	4	4	4
1	3	Plus Two (Intermediate)	Staff in Agricultural Research Sector	0	0	0	0	1	1	0	4	4	5	4	4.25	4	5	5	4	4	4.4	5	4	5	4	4	4.4	4	5	4	4	4	4.2	2	2	4	2	2.5	4	4	4	4	4	1	2	2	4	4	2
0	3	SSC	Staff in Agricultural Research Sector	0	1	1	1	1	1	1	4	4	4	4	4	4	4	4	4	5	4.2	4	4	4	2	4	3.6	4	4	4	4	5	4.2	2	4	4	4	3.5	2	2	4	5	3.25	5	2	4	1	2	2
1	3	Plus Two (Intermediate)	Staff in Agricultural Research Sector	0	1	1	0	1	1	0	4	4	4	2	3.5	4	4	4	4	4	4	4	4	4	4	4	4	4	4	4	4	4	4	4	5	5	5	4.75	5	5	4	4	4.5	5	5	5	4	5	4
0	3	PG and Above	Staff in Agricultural Research Sector	0	0	0	0	1	1	1	4	4	5	4	4.25	4	4	4	4	4	4	4	4	4	4	4	4	5	4	4	5	4	4.4	4	5	5	5	4.75	5	5	5	4	4.75	4	4	4	5	5	5
1	3	Other	Staff in Agricultural Research Sector	0	1	1	1	1	1	1	4	4	4	4	4	4	4	5	4	4	4.2	4	5	5	4	4	4.4	4	4	5	4	4	4.2	2	4	4	2	3	4	4	4	4	4	4	2	2	4	2	2
0	3	Graduate	Staff in Agricultural Research Sector	0	0	0	1	1	1	0	4	4	4	4	4	4	4	4	4	4	4	4	4	5	4	4	4.2	4	4	4	4	4	4	4	4	4	4	4	4	4	4	4	4	4	4	4	4	4	4
1	3	Graduate	Staff in Agricultural Research Sector	0	1	1	1	0	1	1	4	4	5	4	4.25	4	4	4	4	4	4	4	4	4	2	4	3.6	4	4	4	4	4	4	4	5	5	4	4.5	4	4	4	4	4	4	4	4	4	4	4
0	3	PG and Above	Staff in Agricultural Research Sector	1	1	1	0	1	1	1	4	4	4	4	4	4	4	4	4	4	4	4	4	4	4	4	4	4	4	4	4	4	4	4	4	4	4	4	4	4	4	5	4.25	4	4	4	4	4	4
1	3	Plus Two (Intermediate)	Staff in Agricultural Research Sector	1	0	0	0	0	1	0	4	4	4	5	4.25	4	5	5	5	4	4.6	4	4	4	4	4	4	4	4	4	4	5	4.2	5	4	5	5	4.75	5	5	5	5	5	4	4	4	4	4	4
1	3	Graduate	Software Professional	1	1	1	1	1	1	1	4	4	4	4	4	4	4	4	4	4	4	4	4	4	4	4	4	4	4	4	4	4	4	4	4	5	5	4.5	5	5	5	4	4.75	4	5	5	4	5	4
0	3	Plus Two (Intermediate)	Software Professional	0	1	1	0	0	1	0	4	4	4	4	4	4	4	4	4	4	4	4	4	4	4	4	4	5	4	4	4	4	4.2	4	4	5	5	4.5	4	4	4	2	3.5	4	4	4	4	4	4
1	3	Plus Two (Intermediate)	Software Professional	1	0	0	0	1	1	1	4	4	4	4	4	4	4	4	4	4	4	4	4	4	4	4	4	4	4	4	4	4	4	4	4	4	5	4.25	5	4	5	4	4.5	4	4	4	4	4	4
0	3	PG and Above	Staff in Agricultural Research Sector	0	1	1	1	1	1	0	4	4	4	4	4	4	4	4	4	4	4	4	4	4	4	4	4	5	4	4	5	5	4.6	4	4	4	4	4	4	4	4	4	4	4	4	4	4	4	4
1	3	Graduate	Staff in Agricultural Research Sector	1	0	0	0	1	1	1	2	4	4	2	3	2	2	2	4	4	2.8	4	4	4	4	4	4	4	4	4	4	4	4	4	5	4	4	4.25	4	4	4	4	4	4	4	4	4	4	4
0	3	Graduate	Staff in Agricultural Research Sector	0	1	1	0	1	1	1	5	5	4	4	4.5	4	4	4	4	4	4	4	4	4	4	4	4	4	4	4	4	4	4	4	4	4	4	4	4	4	4	4	4	4	4	4	4	4	4
1	3	PG and Above	Administrative Staff	0	0	0	0	1	1	0	4	4	4	4	4	4	4	4	4	4	4	4	4	4	4	4	4	4	4	4	4	5	4.2	4	4	4	4	4	4	5	5	5	4.75	4	4	4	4	4	4
1	3	Other	Staff in Agricultural Research Sector	0	1	1	1	0	1	1	4	4	4	4	4	4	4	4	5	4	4.2	4	4	4	4	2	3.6	4	4	4	4	5	4.2	4	4	4	4	4	4	4	4	4	4	4	4	4	4	4	4
1	3	Graduate	Software Professional	0	1	1	0	0	1	0	2	2	4	2	2.5	2	2	4	2	4	2.8	4	4	4	1	2	3	4	4	4	4	4	4	5	5	5	4	4.75	4	4	4	4	4	4	4	4	4	4	4
0	3	Plus Two (Intermediate)	Staff in Agricultural Research Sector	0	0	0	0	0	1	0	5	1	4	4	3.5	2	4	4	4	2	3.2	2	4	5	5	2	3.6	4	4	4	4	4	4	4	4	5	5	4.5	5	5	5	5	5	4	4	4	4	4	4
1	3	Graduate	Software Professional	0	1	1	0	1	1	1	4	5	4	5	4.5	4	5	5	5	5	4.8	5	4	4	5	5	4.6	4	4	4	4	4	4	4	4	5	4	4.25	5	5	4	4	4.5	4	4	4	4	4	4
0	3	Graduate	Software Professional	1	0	0	1	1	1	1	4	4	5	4	4.25	4	5	5	5	5	4.8	5	5	4	4	4	4.4	4	5	4	4	4	4.2	4	5	5	5	4.75	5	5	5	2	4.25	4	4	4	5	5	5
1	3	PG and Above	Software Professional	1	0	0	0	0	1	1	4	4	4	2	3.5	2	4	4	2	4	3.2	4	4	4	4	2	3.6	4	4	4	4	5	4.2	4	5	4	4	4.25	4	4	4	4	4	4	4	4	4	4	4
1	3	PG and Above	Software Professional	0	1	1	1	1	1	0	4	4	5	4	4.25	4	4	4	4	4	4	4	4	4	4	4	4	1	5	1	1	5	2.6	4	4	4	4	4	4	4	4	4	4	4	4	4	4	4	4
1	3	PG and Above	Staff in Agricultural Research Sector	1	1	1	1	0	1	1	4	4	4	4	4	4	5	5	4	4	4.4	4	4	4	4	4	4	4	4	5	4	4	4.2	4	4	4	4	4	4	4	4	4	4	4	4	4	4	4	4
1	3	PG and Above	Software Professional	0	1	1	1	1	1	0	4	4	4	4	4	4	4	4	4	4	4	4	4	5	4	4	4.2	4	5	4	4	4	4.2	4	4	4	4	4	4	5	5	4	4.5	4	4	4	4	4	4
0	3	Plus Two (Intermediate)	Software Professional	0	0	0	1	1	1	0	5	5	4	4	4.5	5	4	5	5	5	4.8	5	5	5	4	4	4.6	4	4	4	4	5	4.2	4	4	5	4	4.25	4	4	4	4	4	4	4	4	4	4	4
0	3	PG and Above	Software Professional	0	1	1	1	0	1	1	4	4	4	5	4.25	4	4	5	5	5	4.6	5	5	4	4	5	4.6	4	4	4	4	4	4	4	5	5	5	4.75	5	5	5	4	4.75	4	4	4	4	4	5
0	3	PG and Above	Software Professional	1	0	0	0	1	1	0	4	4	4	4	4	4	4	5	5	4	4.4	4	4	2	4	4	3.6	4	4	4	4	4	4	1	5	5	2	3.25	5	5	5	5	5	4	1	1	2	1	2
1	3	Graduate	BPO employee	1	0	0	1	1	1	1	4	4	4	4	4	4	4	4	5	5	4.4	4	5	4	4	4	4.2	4	4	4	4	4	4	4	4	4	4	4	4	4	5	4	4.25	4	4	5	1	2	2
0	3	Other	Software Professional	1	1	1	1	1	1	0	4	4	4	4	4	4	4	4	4	4	4	4	4	4	4	4	4	4	4	4	4	4	4	4	4	4	4	4	4	4	4	4	4	4	4	4	4	4	4
0	3	Plus Two (Intermediate)	Software Professional	1	0	0	0	1	1	1	4	4	4	4	4	4	5	4	4	4	4.2	4	4	4	4	4	4	4	4	4	4	4	4	4	5	5	5	4.75	5	5	4	4	4.5	4	4	4	4	4	4
1	3	PG and Above	Administrative Staff	1	1	1	1	1	1	1	2	4	4	4	3.5	4	4	4	4	4	4	4	4	4	4	4	4	4	4	4	2	4	3.6	4	4	4	5	4.25	4	4	4	4	4	4	4	4	4	4	2
1	3	Graduate	Software Professional	0	0	0	0	0	1	1	4	5	4	4	4.25	4	4	4	4	4	4	5	5	5	4	4	4.6	4	4	4	4	4	4	4	4	4	4	4	4	4	5	5	4.5	4	4	4	2	2	4
1	3	PG and Above	Staff in Agricultural Research Sector	1	1	1	1	1	1	1	4	4	4	4	4	4	4	4	4	4	4	4	4	4	4	4	4	4	4	4	4	4	4	4	4	4	4	4	4	4	4	4	4	4	4	4	4	4	4
0	3	Graduate	Staff in Agricultural Research Sector	0	1	1	0	1	1	1	5	5	4	4	4.5	5	5	5	4	4	4.6	4	4	4	4	4	4	4	4	4	2	4	3.6	4	4	4	4	4	4	4	4	5	4.25	2	2	4	4	2	4
0	3	Graduate	Software Professional	1	1	1	1	0	0	1	4	4	4	4	4	4	4	5	5	5	4.6	5	5	5	4	4	4.6	4	4	4	4	4	4	4	4	4	4	4	4	5	4	4	4.25	4	4	4	4	2	4
1	3	Other	Staff in Agricultural Research Sector	0	1	1	0	0	1	0	4	4	4	4	4	4	4	5	4	5	4.4	5	4	4	4	4	4.2	4	5	4	4	4	4.2	2	4	4	4	3.5	4	4	4	4	4	4	4	4	4	4	4
0	3	Plus Two (Intermediate)	Staff in Agricultural Research Sector	1	1	1	1	1	0	1	4	4	4	4	4	4	5	5	5	5	4.8	5	5	2	4	4	4	4	4	4	4	4	4	4	4	4	4	4	4	4	4	5	4.25	4	4	4	4	4	4
0	3	Other	Staff in Agricultural Research Sector	0	1	1	1	1	1	0	5	4	4	4	4.25	4	5	4	4	4	4.2	4	4	4	4	4	4	4	4	4	4	4	4	4	4	4	5	4.25	4	5	5	5	4.75	4	4	4	4	4	4
1	3	Plus Two (Intermediate)	Software Professional	0	0	0	0	0	0	1	4	4	4	4	4	4	4	4	4	4	4	4	4	4	4	4	4	4	4	4	4	4	4	4	4	4	4	4	4	5	4	4	4.25	4	4	4	2	2	4
0	3	Other	Staff in Agricultural Research Sector	0	1	1	1	0	1	0	4	4	4	4	4	4	4	4	4	4	4	4	4	4	4	4	4	4	4	4	4	4	4	4	4	5	5	4.5	4	4	4	5	4.25	4	4	4	4	4	4
0	3	Other	Staff in Agricultural Research Sector	1	0	0	0	1	0	1	4	4	4	4	4	4	4	4	4	4	4	5	5	4	4	4	4.4	4	4	4	4	4	4	4	4	4	4	4	4	4	4	4	4	4	4	4	4	4	4
0	3	Other	Staff in Agricultural Research Sector	1	1	1	1	0	1	1	4	4	5	4	4.25	4	4	5	4	4	4.2	4	4	4	4	4	4	4	5	4	4	4	4.2	4	4	4	4	4	4	4	4	4	4	4	4	4	2	2	2
1	3	Other	Staff in Agricultural Research Sector	0	0	0	0	0	1	1	4	4	4	4	4	4	5	5	5	5	4.8	5	5	4	4	4	4.4	4	4	4	4	4	4	4	4	4	4	4	4	4	4	5	4.25	4	4	4	4	4	4
0	3	Graduate	Staff in Agricultural Research Sector	1	1	1	1	1	0	1	1	1	5	1	2	1	5	5	2	5	3.6	5	5	5	4	1	4	4	4	4	4	5	4.2	4	4	4	4	4	4	4	4	4	4	4	4	4	4	4	4
0	3	Graduate	Software Professional	1	1	1	1	1	1	1	5	4	4	5	4.5	4	4	4	4	4	4	4	5	4	4	4	4.2	2	1	4	2	4	2.6	4	4	4	4	4	4	4	4	4	4	4	4	4	2	2	2
0	3	Other	Staff in Agricultural Research Sector	1	1	1	1	0	0	0	2	4	5	4	3.75	4	4	4	4	4	4	4	4	4	4	4	4	4	4	4	4	4	4	4	5	4	2	3.75	4	4	4	5	4.25	4	4	4	2	2	4
1	3	Plus Two (Intermediate)	Staff in Agricultural Research Sector	1	1	1	0	0	1	0	4	4	4	4	4	4	5	5	5	5	4.8	5	4	4	4	4	4.2	4	2	4	4	4	3.6	2	4	4	4	3.5	4	4	4	4	4	4	4	4	2	2	2
0	3	Other	Staff in Agricultural Research Sector	1	1	1	1	0	1	0	4	4	4	4	4	4	4	4	5	4	4.2	4	4	4	4	4	4	4	4	4	4	4	4	4	4	4	4	4	4	4	4	5	4.25	4	4	4	2	2	2
0	3	Other	Software Professional	1	0	0	0	0	0	0	4	4	4	4	4	4	4	4	4	4	4	4	5	5	4	4	4.4	4	2	4	4	4	3.6	4	4	4	4	4	4	4	4	4	4	4	4	4	2	2	4
0	3	PG and Above	Staff in Agricultural Research Sector	1	0	0	1	1	1	1	4	4	4	4	4	4	4	4	4	4	4	4	4	4	4	4	4	4	4	4	4	4	4	4	4	4	4	4	4	4	4	4	4	4	4	4	2	4	4
1	3	Plus Two (Intermediate)	Staff in Agricultural Research Sector	1	0	0	1	0	1	1	4	4	4	4	4	4	4	4	4	4	4	4	4	5	2	2	3.4	4	4	4	4	4	4	4	4	4	4	4	4	4	4	4	4	4	4	4	2	2	4
1	3	Plus Two (Intermediate)	Software Professional	1	1	1	1	1	0	0	4	4	4	4	4	4	4	4	4	4	4	5	4	4	4	4	4.2	4	4	4	4	4	4	4	4	4	4	4	4	4	4	4	4	4	4	4	2	2	4
0	3	Graduate	Software Professional	1	1	1	1	1	1	1	4	4	4	4	4	2	4	4	4	4	3.6	4	4	4	4	4	4	4	5	2	4	4	3.8	4	4	4	4	4	4	5	5	4	4.5	4	4	4	2	2	4
0	3	Graduate	Staff in Agricultural Research Sector	1	0	0	0	0	0	0	4	4	4	4	4	4	4	4	4	4	4	4	4	5	4	4	4.2	4	4	4	4	4	4	4	4	4	4	4	5	4	4	4	4.25	4	4	4	4	4	4
0	3	PG and Above	Staff in Agricultural Research Sector	1	1	1	0	1	1	1	4	4	4	4	4	4	4	4	5	4	4.2	5	5	5	4	4	4.6	4	4	4	4	4	4	4	4	4	4	4	4	4	4	4	4	2	4	2	4	4	4
0	3	Graduate	Staff in Agricultural Research Sector	1	0	0	0	0	0	0	4	4	4	4	4	2	4	4	4	4	3.6	4	4	4	4	4	4	4	4	4	4	4	4	4	4	4	4	4	4	4	4	4	4	4	4	4	2	2	4
1	3	Other	Staff in Agricultural Research Sector	1	1	1	1	0	1	1	4	4	4	4	4	4	4	4	4	4	4	4	4	5	4	4	4.2	4	4	4	4	4	4	4	4	4	4	4	4	4	4	4	4	4	4	4	2	2	2
1	3	Graduate	Staff in Agricultural Research Sector	1	1	1	0	0	1	1	4	4	5	4	4.25	4	4	4	5	4	4.2	5	5	5	4	4	4.6	4	4	4	4	4	4	4	4	4	4	4	4	4	4	4	4	4	4	4	4	4	4
1	3	Other	Staff in Agricultural Research Sector	1	0	0	0	0	0	0	4	4	4	4	4	4	4	4	4	4	4	5	4	4	4	4	4.2	4	4	4	4	5	4.2	4	4	4	4	4	4	4	4	5	4.25	4	2	4	2	2	2
0	3	SSC	Staff in Agricultural Research Sector	1	1	1	1	0	1	1	4	4	4	4	4	4	4	5	5	4	4.4	4	4	5	4	4	4.2	4	4	4	4	4	4	4	4	4	4	4	4	5	4	4	4.25	4	4	4	4	4	4
0	3	Graduate	Staff in Agricultural Research Sector	1	1	1	1	1	0	0	4	4	4	4	4	4	4	4	4	4	4	4	4	4	4	4	4	5	4	5	5	5	4.8	4	5	5	4	4.5	5	4	5	4	4.5	4	4	4	4	4	4
1	3	Plus Two (Intermediate)	Staff in Agricultural Research Sector	1	1	1	1	0	0	0	4	4	4	4	4	4	4	4	4	4	4	4	4	4	4	4	4	4	4	2	4	5	3.8	4	4	4	4	4	4	5	4	4	4.25	4	4	4	4	4	4
1	3	Plus Two (Intermediate)	Staff in Agricultural Research Sector	1	1	1	0	0	1	1	4	4	4	4	4	4	4	4	4	4	4	4	4	5	4	4	4.2	5	4	5	4	4	4.4	5	5	4	4	4.5	5	5	4	4	4.5	4	4	5	4	4	5
1	3	Graduate	Staff in Agricultural Research Sector	1	1	1	0	0	1	1	4	4	5	4	4.25	4	4	4	4	4	4	4	4	4	4	4	4	4	4	4	4	4	4	4	5	4	4	4.25	4	4	4	4	4	4	5	2	4	4	4
1	3	PG and Above	Staff in Agricultural Research Sector	1	0	0	1	0	1	1	4	4	4	4	4	4	4	4	4	4	4	4	4	4	4	4	4	4	2	5	4	4	3.8	4	4	4	4	4	4	4	5	4	4.25	4	4	5	4	4	4
1	3	PG and Above	Software Professional	1	1	1	0	0	0	0	4	4	4	4	4	4	5	4	2	4	3.8	4	4	5	4	4	4.2	4	4	4	4	4	4	4	4	4	4	4	4	4	5	5	4.5	4	4	4	2	4	2
1	3	PG and Above	Software Professional	1	1	1	0	0	1	1	2	2	1	4	2.25	2	4	4	4	4	3.6	4	4	4	4	4	4	4	4	4	4	4	4	4	4	5	4	4.25	4	4	4	4	4	2	4	5	4	4	5
1	3	PG and Above	Software Professional	1	0	0	1	1	0	0	4	4	4	4	4	4	4	4	4	4	4	4	4	5	4	4	4.2	2	5	4	4	4	3.8	4	4	4	4	4	4	4	4	4	4	2	2	4	2	4	2
1	3	Graduate	Staff in Agricultural Research Sector	1	0	0	0	0	0	0	4	4	2	4	3.5	4	4	4	4	4	4	4	4	4	4	4	4	2	4	4	2	4	3.2	4	4	4	4	4	4	4	4	4	4	4	4	4	4	4	4
1	3	Plus Two (Intermediate)	Staff in Agricultural Research Sector	1	1	1	0	1	1	1	4	4	4	4	4	4	4	4	4	4	4	4	4	4	4	4	4	2	4	4	4	4	3.6	4	4	4	5	4.25	4	4	4	4	4	4	4	4	4	4	4
1	3	Graduate	Staff in Agricultural Research Sector	1	1	1	0	0	0	0	2	4	2	4	3	4	4	4	4	4	4	4	4	4	4	4	4	4	4	4	4	4	4	2	4	4	4	3.5	4	5	4	4	4.25	4	4	4	2	2	2
0	3	Plus Two (Intermediate)	Administrative Staff	1	0	0	1	1	1	1	4	4	4	4	4	4	4	4	4	4	4	4	4	4	4	4	4	4	5	4	4	4	4.2	4	4	4	4	4	4	4	4	4	4	2	2	4	4	4	2
0	3	Plus Two (Intermediate)	Staff in Agricultural Research Sector	1	0	0	0	0	0	0	4	4	4	4	4	4	4	4	4	4	4	5	5	4	4	4	4.4	4	4	4	2	4	3.6	4	4	4	4	4	4	4	4	4	4	4	2	4	4	2	2
1	3	PG and Above	Software Professional	1	1	1	0	0	1	1	4	4	4	4	4	4	4	4	4	5	4.2	4	4	4	4	4	4	4	4	4	2	4	3.6	4	4	4	4	4	4	5	4	4	4.25	4	4	4	4	4	4
1	3	Plus Two (Intermediate)	Staff in Agricultural Research Sector	0	0	0	1	1	1	1	4	4	5	2	3.75	4	4	4	4	4	4	4	4	4	2	4	3.6	2	4	4	4	4	3.6	2	4	4	4	3.5	4	4	4	4	4	2	4	4	2	2	4
0	3	PG and Above	Software Professional	1	0	0	0	1	1	1	4	4	4	4	4	4	4	4	4	4	4	4	4	4	4	4	4	2	4	4	4	4	3.6	2	4	4	4	3.5	4	4	4	4	4	4	4	4	4	2	4
0	3	Graduate	Software Professional	1	1	1	1	0	1	1	4	4	4	4	4	4	4	4	4	4	4	4	4	4	4	4	4	4	4	4	4	4	4	4	4	4	4	4	4	4	4	4	4	4	4	4	2	2	4
1	3	Graduate	Software Professional	1	1	1	0	0	1	1	4	4	4	4	4	4	4	4	4	4	4	4	4	4	4	4	4	4	1	4	4	4	3.4	4	4	4	5	4.25	4	4	4	4	4	4	4	4	2	2	4
1	3	Plus Two (Intermediate)	Software Professional	1	0	0	1	1	1	1	4	4	4	4	4	4	4	4	4	4	4	4	4	5	4	2	3.8	4	5	4	2	4	3.8	4	4	4	4	4	4	4	4	4	4	4	4	4	4	2	4
0	3	PG and Above	Staff in Agricultural Research Sector	1	0	0	1	1	0	0	4	4	4	4	4	4	4	4	4	4	4	5	4	4	4	4	4.2	4	2	4	4	5	3.8	4	4	4	4	4	5	4	5	4	4.5	4	4	4	4	4	4
0	3	Other	Software Professional	1	0	0	1	1	1	1	4	4	4	4	4	4	5	5	4	5	4.6	4	5	4	4	4	4.2	4	4	4	4	4	4	2	4	4	5	3.75	4	4	4	4	4	4	4	4	4	4	4
1	3	Graduate	Software Professional	1	0	0	1	0	0	0	4	4	4	4	4	4	4	4	4	4	4	5	4	4	4	4	4.2	4	4	2	4	4	3.6	4	5	5	4	4.5	4	5	4	5	4.5	4	4	4	4	4	4
1	3	PG and Above	Software Professional	1	1	1	0	0	1	1	5	5	4	5	4.75	5	5	4	4	5	4.6	5	4	4	4	4	4.2	4	4	4	4	4	4	4	4	4	4	4	5	4	4	4	4.25	2	4	4	4	4	4
1	3	Other	Software Professional	1	0	0	0	1	0	0	4	4	4	2	3.5	4	5	4	4	4	4.2	4	4	4	4	5	4.2	4	4	4	4	4	4	4	4	4	4	4	4	4	4	4	4	4	4	2	2	4	4
0	3	Graduate	BPO employee	1	1	1	0	0	1	1	4	5	4	5	4.5	4	4	4	4	4	4	4	5	4	4	4	4.2	4	4	4	4	4	4	4	4	4	4	4	4	4	4	4	4	4	4	4	2	4	4
0	3	Plus Two (Intermediate)	Software Professional	1	1	1	1	1	1	1	4	4	4	4	4	4	4	4	4	4	4	4	5	5	4	4	4.4	4	4	4	4	4	4	4	4	5	4	4.25	4	4	5	5	4.5	4	4	4	4	4	4
1	3	Plus Two (Intermediate)	Software Professional	1	0	0	0	1	1	1	4	4	2	5	3.75	4	4	5	4	4	4.2	4	4	4	2	4	3.6	4	4	4	4	4	4	4	4	4	4	4	4	4	4	5	4.25	4	4	4	4	4	4
0	3	Graduate	Administrative Staff	1	1	1	0	0	1	1	4	4	4	4	4	4	4	4	4	4	4	4	4	4	2	2	3.2	5	4	5	4	4	4.4	4	4	4	4	4	4	4	4	4	4	2	4	4	2	4	4
1	3	Other	Software Professional	1	0	0	1	0	1	1	4	4	4	4	4	4	4	4	4	4	4	4	4	4	4	4	4	4	4	4	4	4	4	4	4	4	4	4	4	4	4	4	4	4	4	4	2	4	4
1	3	Plus Two (Intermediate)	Staff in Agricultural Research Sector	1	0	0	1	1	0	0	2	2	5	4	3.25	4	4	4	5	4	4.2	4	4	4	4	4	4	5	5	4	4	4	4.4	4	5	5	5	4.75	4	4	4	4	4	4	4	5	4	4	4
0	3	Graduate	Staff in Agricultural Research Sector	1	0	0	1	0	0	0	4	2	4	4	3.5	2	4	4	4	4	3.6	5	4	4	4	4	4.2	4	4	4	4	4	4	4	4	4	4	4	4	4	4	4	4	4	4	4	4	4	4
0	3	PG and Above	Software Professional	1	0	0	0	1	0	0	2	2	4	4	3	4	4	4	4	4	4	4	4	4	2	2	3.2	4	4	4	4	4	4	4	4	4	4	4	4	4	4	4	4	4	4	4	4	4	4
1	3	Other	Staff in Agricultural Research Sector	1	0	0	0	1	1	1	4	4	4	4	4	4	4	4	4	4	4	4	4	4	4	2	3.6	4	4	4	4	4	4	4	4	4	4	4	4	4	4	4	4	4	4	4	4	4	4
0	3	Other	Staff in Agricultural Research Sector	1	1	1	1	1	1	1	4	4	5	4	4.25	4	4	4	4	4	4	5	4	4	4	4	4.2	4	4	4	4	4	4	4	4	4	4	4	4	4	4	4	4	4	4	4	4	4	4
1	3	Other	Staff in Agricultural Research Sector	1	0	0	0	1	0	0	4	4	4	4	4	2	4	4	4	4	3.6	4	4	4	2	4	3.6	4	4	5	2	4	3.8	2	2	2	4	2.5	4	4	4	4	4	4	4	2	4	4	4
1	3	PG and Above	Software Professional	1	0	0	0	1	1	1	4	4	4	4	4	2	4	4	4	4	3.6	4	4	4	4	4	4	4	4	4	5	5	4.4	4	4	4	4	4	4	4	4	4	4	4	4	4	4	4	4
1	3	PG and Above	Staff in Agricultural Research Sector	1	0	0	1	0	0	0	2	2	4	4	3	4	4	4	4	4	4	4	4	4	4	4	4	4	4	5	4	4	4.2	4	4	4	4	4	4	4	4	4	4	4	4	4	4	4	4
1	3	Graduate	Staff in Agricultural Research Sector	1	0	0	0	1	1	1	2	2	4	4	3	4	4	4	5	4	4.2	4	4	4	4	4	4	4	4	4	4	4	4	4	4	4	5	4.25	4	4	4	4	4	4	2	4	4	4	4
1	3	Plus Two (Intermediate)	Staff in Agricultural Research Sector	1	0	0	0	1	1	1	4	4	4	4	4	4	4	4	4	4	4	4	4	4	4	4	4	4	4	4	2	2	3.2	2	2	4	2	2.5	4	4	4	4	4	1	2	2	4	4	2
0	3	PG and Above	Staff in Agricultural Research Sector	1	0	0	0	0	0	0	2	4	1	4	2.75	4	4	4	4	5	4.2	4	5	4	4	4	4.2	1	1	4	5	1	2.4	2	4	4	4	3.5	2	2	4	5	3.25	5	2	4	1	2	2
1	3	PG and Above	Staff in Agricultural Research Sector	1	1	1	1	1	1	1	4	4	5	4	4.25	2	4	4	5	4	3.8	4	4	4	4	4	4	4	4	4	4	5	4.2	4	5	5	5	4.75	5	5	4	4	4.5	5	5	5	4	5	4
1	3	SSC	Software Professional	1	0	0	0	0	1	1	4	4	2	4	3.5	4	5	5	4	4	4.4	5	4	5	4	4	4.4	4	4	4	4	4	4	4	5	5	5	4.75	5	5	5	4	4.75	4	4	4	5	5	5
0	3	Plus Two (Intermediate)	Staff in Agricultural Research Sector	1	1	1	0	1	1	1	4	4	4	4	4	4	4	4	4	5	4.2	4	4	4	2	4	3.6	4	4	4	4	4	4	2	4	4	2	3	4	4	4	4	4	4	2	2	4	2	2
1	3	Plus Two (Intermediate)	Staff in Agricultural Research Sector	1	0	0	0	0	1	1	4	4	4	2	3.5	4	4	4	4	4	4	4	4	4	4	4	4	4	4	4	4	4	4	4	4	4	4	4	4	4	4	4	4	4	4	4	4	4	4
0	3	Plus Two (Intermediate)	Staff in Agricultural Research Sector	1	1	1	1	1	1	1	4	4	4	4	4	4	4	4	4	4	4	4	4	4	4	4	4	4	4	4	4	4	4	4	5	5	4	4.5	4	4	4	4	4	4	4	4	4	4	4
1	3	Plus Two (Intermediate)	Software Professional	1	1	1	0	0	0	0	4	4	4	4	4	4	4	5	4	4	4.2	4	5	5	4	4	4.4	4	4	4	4	4	4	4	4	4	4	4	4	4	4	5	4.25	4	4	4	4	4	4
0	3	PG and Above	Staff in Agricultural Research Sector	1	0	1	0	1	1	1	4	4	4	4	4	4	4	4	4	4	4	4	4	5	4	4	4.2	4	4	1	5	5	3.8	5	4	5	5	4.75	5	5	5	5	5	4	4	4	4	4	4
1	3	Plus Two (Intermediate)	Staff in Agricultural Research Sector	1	1	1	0	1	1	1	4	4	4	4	4	4	4	4	4	4	4	4	4	4	2	4	3.6	4	4	4	4	4	4	4	4	5	5	4.5	5	5	5	4	4.75	4	5	5	4	5	4
0	3	Graduate	Software Professional	1	0	1	1	0	0	0	4	4	4	4	4	4	4	4	4	4	4	4	4	4	4	4	4	4	2	4	4	4	3.6	4	4	5	5	4.5	4	4	4	2	3.5	4	4	4	4	4	4
1	3	Plus Two (Intermediate)	Software Professional	1	1	1	1	1	0	0	4	4	4	5	4.25	4	5	5	5	4	4.6	4	4	4	4	4	4	4	4	4	4	4	4	4	4	4	5	4.25	5	4	5	4	4.5	4	4	4	4	4	4
1	3	PG and Above	Staff in Agricultural Research Sector	1	0	1	0	0	1	1	4	4	4	4	4	4	4	4	4	4	4	4	4	4	4	4	4	4	4	4	4	4	4	4	4	4	4	4	4	4	4	4	4	4	4	4	4	4	4
0	3	Graduate	Staff in Agricultural Research Sector	1	1	1	0	1	1	1	4	4	4	4	4	4	4	4	4	4	4	4	4	4	4	4	4	4	4	4	4	4	4	4	5	4	4	4.25	4	4	4	4	4	4	4	4	4	4	4
1	3	PG and Above	Staff in Agricultural Research Sector	1	0	1	0	0	0	0	4	4	4	4	4	4	4	4	4	4	4	4	4	4	4	4	4	4	4	4	2	4	3.6	4	4	4	4	4	4	4	4	4	4	4	4	4	4	4	4
0	3	Graduate	Staff in Agricultural Research Sector	1	1	1	0	1	0	0	4	4	4	4	4	4	4	4	4	4	4	4	4	4	4	4	4	4	4	4	4	5	4.2	4	4	4	4	4	4	5	5	5	4.75	4	4	4	4	4	4
1	3	PG and Above	Staff in Agricultural Research Sector	1	1	1	1	1	1	1	2	4	4	2	3	2	2	2	4	4	2.8	4	4	4	4	4	4	4	4	4	4	4	4	4	4	4	4	4	4	4	4	4	4	4	4	4	4	4	4
0	3	Graduate	Staff in Agricultural Research Sector	1	0	1	1	1	0	0	5	5	4	4	4.5	4	4	4	4	4	4	4	4	4	4	4	4	4	4	4	5	5	4.4	5	5	5	4	4.75	4	4	4	4	4	4	4	4	4	4	4
1	3	Graduate	Staff in Agricultural Research Sector	1	1	1	1	0	0	0	4	4	4	4	4	4	4	4	4	4	4	4	4	4	4	4	4	4	4	4	4	4	4	4	4	5	5	4.5	5	5	5	5	5	4	4	4	4	4	4
1	3	Plus Two (Intermediate)	Staff in Agricultural Research Sector	1	0	1	0	1	1	1	4	4	4	4	4	4	4	4	5	4	4.2	4	4	4	4	2	3.6	4	4	4	4	4	4	4	4	5	4	4.25	5	5	4	4	4.5	4	4	4	4	4	4
1	3	Other	Staff in Agricultural Research Sector	1	1	1	0	0	1	1	2	2	4	2	2.5	2	2	4	2	4	2.8	4	4	4	1	2	3	4	4	4	4	4	4	4	5	5	5	4.75	5	5	5	2	4.25	4	4	4	5	5	5
0	3	PG and Above	Staff in Agricultural Research Sector	1	1	1	1	1	0	0	5	1	2	4	3	2	4	4	4	2	3.2	2	4	5	5	2	3.6	2	2	4	5	4	3.4	4	5	4	4	4.25	4	4	4	4	4	4	4	4	4	4	4
1	3	Graduate	Staff in Agricultural Research Sector	1	0	1	1	1	0	0	4	5	4	5	4.5	4	5	5	5	5	4.8	5	4	4	5	5	4.6	4	4	4	4	4	4	4	4	4	4	4	4	4	4	4	4	4	4	4	4	4	4
0	3	Graduate	Staff in Agricultural Research Sector	1	1	1	1	1	0	0	4	4	4	4	4	4	5	5	5	5	4.8	5	5	4	4	4	4.4	4	4	4	4	4	4	4	4	4	4	4	4	4	4	4	4	4	4	4	4	4	4
1	3	Graduate	Software Professional	1	1	1	1	1	0	0	4	4	4	2	3.5	2	4	4	2	4	3.2	4	4	4	4	2	3.6	4	4	4	4	4	4	4	4	4	4	4	4	5	5	4	4.5	4	4	4	4	4	4
1	3	Graduate	Software Professional	1	0	1	1	0	1	1	4	4	2	4	3.5	4	4	4	4	4	4	4	4	4	4	4	4	4	4	4	4	4	4	4	4	5	4	4.25	4	4	4	4	4	4	4	4	4	4	4
1	3	Other	Software Professional	1	1	1	1	0	0	0	4	4	4	4	4	4	5	5	4	4	4.4	4	4	4	4	4	4	4	4	4	4	4	4	4	5	5	5	4.75	5	5	5	4	4.75	4	4	4	4	4	5
1	3	PG and Above	Staff in Agricultural Research Sector	1	0	1	1	0	1	1	4	4	4	4	4	4	4	4	4	4	4	4	4	5	4	4	4.2	4	4	4	1	1	2.8	1	5	5	2	3.25	5	5	5	5	5	4	1	1	2	1	2
0	4	Other	Staff in Agricultural Research Sector	1	1	1	0	1	1	1	5	5	4	4	4.5	5	4	5	5	5	4.8	5	5	5	4	4	4.6	4	4	2	5	4	3.8	4	4	4	4	4	4	4	5	4	4.25	4	4	5	1	2	2
0	4	Graduate	Staff in Agricultural Research Sector	1	0	1	0	0	0	0	4	4	4	5	4.25	4	4	5	5	5	4.6	5	5	4	4	5	4.6	4	4	4	2	4	3.6	4	4	4	4	4	4	4	4	4	4	4	4	4	4	4	4
0	4	Other	Administrative Staff	1	1	1	1	0	1	1	4	4	4	4	4	4	4	5	5	4	4.4	4	4	2	4	4	3.6	4	4	4	4	5	4.2	4	4	2	2	3	2	2	4	4	3	4	4	4	4	5	4
1	4	Other	Staff in Agricultural Research Sector	1	1	1	1	1	0	0	4	4	4	4	4	4	4	4	5	5	4.4	4	5	4	4	4	4.2	4	4	4	4	4	4	4	4	2	2	3	2	1	5	5	3.25	4	4	4	4	4	4
0	4	PG and Above	Software Professional	1	0	1	0	1	0	0	4	4	4	4	4	4	4	4	4	4	4	4	4	4	4	4	4	4	4	4	4	4	4	4	4	4	4	4	2	2	4	4	3	4	4	4	4	4	4
0	4	Graduate	Staff in Agricultural Research Sector	1	1	1	0	1	0	0	4	4	4	4	4	4	5	4	4	4	4.2	4	4	4	4	4	4	4	4	4	4	4	4	4	4	2	2	3	2	1	5	5	3.25	4	4	4	4	4	4
1	4	PG and Above	Software Professional	1	0	1	1	0	0	0	2	4	4	4	3.5	4	4	4	4	4	4	4	4	4	4	4	4	4	4	4	4	4	4	4	4	4	4	4	2	2	4	4	3	4	4	4	4	4	4
1	4	PG and Above	Software Professional	1	0	1	1	0	0	0	4	5	4	4	4.25	4	4	4	4	4	4	5	5	5	4	4	4.6	4	4	4	4	2	3.6	2	2	4	4	3	4	4	1	4	3.25	4	4	4	4	4	4
1	3	Graduate	Software Professional	1	1	1	0	1	1	1	4	4	4	4	4	4	4	4	4	4	4	4	4	4	4	4	4	4	4	4	5	5	4.4	5	5	2	2	3.5	2	2	5	5	3.5	5	5	5	5	5	5
0	3	PG and Above	Software Professional	1	1	1	0	0	0	0	5	5	5	4	4.75	5	5	5	4	4	4.6	4	4	4	4	4	4	5	5	4	4	4	4.4	2	2	4	4	3	4	4	4	4	4	4	4	4	4	4	4
0	3	PG and Above	Staff in Agricultural Research Sector	1	1	1	1	0	0	0	4	4	4	4	4	4	4	5	5	5	4.6	5	5	5	4	4	4.6	4	4	4	5	4	4.2	5	4	4	4	4.25	2	2	5	5	3.5	5	4	4	4	4	4
1	3	PG and Above	Software Professional	1	0	1	1	1	0	0	4	4	4	4	4	4	4	5	4	5	4.4	5	4	4	4	4	4.2	5	4	4	2	4	3.8	2	4	4	4	3.5	4	2	4	1	2.75	1	1	2	1	1	1
0	2	PG and Above	Software Professional	1	1	1	1	0	0	0	5	5	4	5	4.75	5	5	4	4	5	4.6	5	4	4	4	4	4.2	4	4	4	4	4	4	4	5	5	4	4.5	4	4	5	4	4.25	4	1	2	2	4	4
0	4	PG and Above	Software Professional	1	0	1	0	0	0	0	4	4	4	2	3.5	4	5	4	4	4	4.2	4	4	4	4	5	4.2	4	4	4	5	5	4.4	5	5	4	4	4.5	4	4	5	5	4.5	5	2	5	4	2	2
1	4	Graduate	Software Professional	1	0	1	0	0	0	0	4	5	4	5	4.5	4	4	4	4	4	4	4	5	4	4	4	4.2	4	4	4	2	4	3.6	4	2	2	2	2.5	2	2	4	5	3.25	4	4	4	4	4	4
0	4	PG and Above	BPO employee	1	1	1	1	1	1	1	4	4	4	4	4	4	4	4	4	4	4	4	5	5	4	4	4.4	4	4	4	1	4	3.4	4	4	4	2	3.5	2	4	4	4	3.5	4	1	1	2	2	1
0	4	PG and Above	Software Professional	1	0	1	0	0	0	0	4	4	2	5	3.75	4	4	5	4	4	4.2	4	4	4	2	4	3.6	2	4	5	2	4	3.4	4	4	2	2	3	2	2	4	4	3	4	4	4	4	4	4
0	4	Graduate	Software Professional	1	1	1	1	0	1	1	4	4	4	4	4	4	4	4	4	4	4	4	4	4	2	2	3.2	2	2	4	4	4	3.2	4	4	2	2	3	2	2	5	5	3.5	5	4	4	4	4	4
1	2	PG and Above	Administrative Staff	1	0	1	1	0	0	0	4	4	2	4	3.5	4	4	4	4	4	4	4	4	4	4	4	4	2	4	5	4	5	4	4	5	2	2	3.25	1	1	5	5	3	4	4	4	4	4	5
0	2	PG and Above	Software Professional	1	1	1	0	1	1	1	2	2	4	4	3	4	4	4	5	4	4.2	4	4	4	4	4	4	4	4	4	4	5	4.2	5	5	1	1	3	1	1	5	5	3	4	4	4	5	5	5
0	2	PG and Above	Staff in Agricultural Research Sector	1	1	1	0	0	1	1	4	2	4	4	3.5	2	4	4	4	4	3.6	5	4	4	4	4	4.2	4	4	4	4	5	4.2	5	5	1	2	3.25	2	1	4	4	2.75	4	4	4	4	4	4
0	2	Graduate	Staff in Agricultural Research Sector	1	1	1	1	0	1	1	2	2	4	4	3	4	4	4	4	4	4	4	4	4	2	2	3.2	4	2	4	4	4	3.6	4	4	1	1	2.5	1	2	4	4	2.75	4	4	5	4	4	4
1	2	Graduate	Software Professional	1	1	1	0	0	1	1	4	4	4	4	4	4	4	4	4	4	4	4	4	4	4	2	3.6	4	2	4	4	4	3.6	4	4	2	2	3	1	1	4	4	2.5	4	4	4	4	4	5
0	2	Plus Two (Intermediate)	Staff in Agricultural Research Sector	1	1	1	1	1	1	1	4	4	2	4	3.5	4	4	4	4	4	4	5	4	4	4	4	4.2	2	4	2	4	4	3.2	4	4	2	2	3	2	2	4	4	3	4	4	4	4	4	4
1	4	Graduate	Staff in Agricultural Research Sector	1	1	1	1	1	1	1	4	4	2	4	3.5	2	4	4	4	4	3.6	4	4	4	2	4	3.6	2	4	2	4	4	3.2	4	4	2	1	2.75	1	2	4	4	2.75	4	4	4	4	4	5
1	2	PG and Above	Staff in Agricultural Research Sector	1	0	1	1	0	1	1	4	4	4	4	4	2	4	4	4	4	3.6	4	4	4	4	4	4	4	4	2	4	4	3.6	4	4	2	2	3	2	2	4	4	3	4	4	4	4	5	4
1	2	PG and Above	Software Professional	1	1	1	1	0	1	1	4	4	4	4	4	4	4	4	4	4	4	4	4	4	4	4	4	4	4	4	5	4	4.2	4	4	1	1	2.5	1	1	4	4	2.5	4	4	5	4	4	4
1	4	PG and Above	Staff in Agricultural Research Sector	1	0	1	1	0	1	1	4	4	4	4	4	4	4	4	5	4	4.2	4	4	4	4	4	4	4	2	4	4	4	3.6	4	4	2	2	3	2	2	4	4	3	4	4	4	4	4	4
1	2	PG and Above	Staff in Agricultural Research Sector	1	1	1	0	1	1	1	4	4	4	4	4	4	4	4	4	4	4	4	4	4	4	4	4	4	4	4	4	4	4	4	4	4	4	4	4	4	4	4	4	4	4	4	4	4	4
0	2	PG and Above	Staff in Agricultural Research Sector	1	0	1	1	0	1	1	4	5	5	5	4.75	4	4	4	4	5	4.2	4	5	4	4	4	4.2	4	4	4	4	4	4	4	4	2	2	3	1	2	4	4	2.75	4	4	5	4	4	4
1	2	Graduate	Staff in Agricultural Research Sector	1	1	1	1	0	1	1	4	4	4	4	4	2	4	4	5	4	3.8	4	4	4	4	4	4	4	4	2	4	4	3.6	4	4	1	1	2.5	2	1	5	5	3.25	4	4	5	4	4	4
1	4	PG and Above	Staff in Agricultural Research Sector	1	1	1	1	0	1	1	4	4	4	4	4	4	5	5	4	4	4.4	5	4	5	4	4	4.4	4	4	2	5	5	4	4	4	1	1	2.5	1	1	5	5	3	5	4	4	4	4	4
0	1	PG and Above	Software Professional	1	1	1	1	0	1	1	4	4	4	4	4	4	4	4	4	5	4.2	4	4	4	2	4	3.6	4	4	4	4	4	4	4	4	4	4	4	4	2	4	4	3.5	4	4	4	4	4	4
1	1	PG and Above	Staff in Agricultural Research Sector	1	1	1	1	0	1	1	4	4	4	4	4	4	4	4	4	4	4	4	4	4	4	4	4	4	4	4	4	4	4	4	4	2	2	3	2	2	4	4	3	4	4	4	4	4	4
0	1	Other	Staff in Agricultural Research Sector	1	1	1	1	1	1	1	2	2	2	4	2.5	4	4	4	4	4	4	4	4	4	4	4	4	4	4	4	4	4	4	4	4	2	2	3	2	2	4	4	3	4	4	4	4	4	4
1	1	PG and Above	Staff in Agricultural Research Sector	1	0	1	1	0	1	1	4	4	4	4	4	4	4	5	4	4	4.2	4	5	5	4	4	4.4	4	4	4	4	4	4	4	4	1	1	2.5	1	1	4	4	2.5	4	4	4	4	5	4
0	1	Graduate	Software Professional	1	0	1	1	0	1	1	4	4	4	4	4	4	4	4	4	4	4	4	4	5	4	4	4.2	4	4	4	4	4	4	4	4	2	2	3	2	1	4	4	2.75	4	4	4	4	5	4
1	1	PG and Above	Staff in Agricultural Research Sector	1	0	1	1	1	1	1	4	4	4	5	4.25	4	4	4	4	4	4	4	4	4	2	4	3.6	4	4	4	4	5	4.2	5	5	1	1	3	1	1	5	5	3	5	4	5	4	4	5
0	1	Graduate	Staff in Agricultural Research Sector	1	1	1	1	1	1	1	2	2	4	2	2.5	4	4	4	4	4	4	4	4	4	4	4	4	4	4	4	1	1	2.8	1	1	4	4	2.5	4	4	5	1	3.5	1	1	1	1	1	1
1	1	PG and Above	Software Professional	1	1	1	1	0	1	1	2	4	4	4	3.5	4	5	5	5	4	4.6	4	4	4	4	4	4	4	4	4	4	4	4	4	5	2	2	3.25	2	2	4	4	3	4	4	4	4	4	5
1	4	Graduate	Software Professional	1	0	1	1	0	1	1	4	5	5	5	4.75	4	4	4	4	4	4	4	4	4	4	4	4	4	4	4	4	4	4	4	4	2	2	3	2	1	4	4	2.75	4	4	5	4	4	4
0	4	Graduate	Staff in Agricultural Research Sector	1	1	1	1	1	1	1	4	5	5	5	4.75	4	4	4	4	4	4	4	4	4	4	4	4	4	2	4	4	4	3.6	4	4	1	1	2.5	2	2	5	5	3.5	5	5	4	4	5	4
1	4	PG and Above	Staff in Agricultural Research Sector	1	0	1	1	0	1	1	2	4	4	2	3	4	4	4	4	4	4	4	4	4	4	4	4	5	4	4	4	4	4.2	4	4	2	2	3	2	2	4	4	3	4	4	4	4	4	5
0	4	Graduate	Staff in Agricultural Research Sector	1	1	1	1	0	1	1	4	4	4	4	4	4	4	4	4	4	4	4	4	4	4	4	4	4	4	4	4	4	4	4	4	2	2	3	2	2	4	4	3	5	4	4	4	4	4
1	4	Other	Staff in Agricultural Research Sector	1	1	1	1	1	1	1	4	5	5	4	4.5	2	2	2	4	4	2.8	4	4	4	4	4	4	4	4	4	4	4	4	4	4	2	2	3	2	2	4	4	3	5	4	4	4	4	5
0	4	PG and Above	Staff in Agricultural Research Sector	1	0	1	1	1	1	1	4	4	4	4	4	4	4	4	4	4	4	4	4	4	4	4	4	2	2	4	4	4	3.2	4	4	2	2	3	2	2	4	4	3	5	4	4	4	4	4
1	4	Graduate	Staff in Agricultural Research Sector	1	1	1	1	0	1	1	5	4	5	5	4.75	4	4	4	4	4	4	4	4	4	4	4	4	1	2	4	4	4	3	4	4	2	2	3	2	1	4	4	2.75	4	4	4	4	5	4
1	4	Graduate	Staff in Agricultural Research Sector	1	1	1	1	0	1	1	4	4	5	5	4.5	4	4	4	5	4	4.2	4	4	4	4	2	3.6	5	4	4	4	4	4.2	4	4	2	2	3	2	2	4	4	3	5	4	4	4	4	4
1	4	Graduate	Staff in Agricultural Research Sector	1	1	1	1	0	1	1	4	4	5	5	4.5	2	2	4	2	4	2.8	4	4	4	1	2	3	4	4	4	4	4	4	4	4	2	2	3	2	1	4	4	2.75	4	4	4	4	4	4
0	4	Graduate	Staff in Agricultural Research Sector	1	1	1	1	0	1	1	4	4	4	5	4.25	2	4	4	4	2	3.2	2	4	5	5	2	3.6	4	2	5	4	4	3.8	4	4	1	1	2.5	1	1	4	4	2.5	5	4	4	4	5	4
1	4	Graduate	Staff in Agricultural Research Sector	1	1	1	1	1	1	1	4	4	4	4	4	4	5	5	5	5	4.8	5	4	4	5	5	4.6	4	4	4	4	4	4	4	4	2	2	3	1	2	4	4	2.75	5	4	5	4	4	4
0	4	PG and Above	Staff in Agricultural Research Sector	1	0	1	1	0	1	1	4	5	4	4	4.25	4	5	5	5	5	4.8	5	5	4	4	4	4.4	4	4	4	4	4	4	4	4	1	1	2.5	2	2	4	4	3	4	4	4	4	4	4
1	4	PG and Above	Staff in Agricultural Research Sector	1	1	1	1	1	1	1	4	4	4	4	4	2	4	4	2	4	3.2	4	4	4	4	2	3.6	4	4	2	4	4	3.6	4	4	2	2	3	2	2	4	4	3	4	4	4	4	4	4
1	4	Graduate	Software Professional	1	1	1	1	1	1	1	4	4	4	4	4	4	4	4	4	4	4	4	4	4	4	4	4	5	5	1	4	4	3.8	4	4	2	2	3	2	2	4	5	3.25	4	4	4	4	4	4
1	4	Graduate	Software Professional	1	0	0	1	0	1	1	4	4	4	4	4	4	5	5	4	4	4.4	4	4	4	4	4	4	4	4	5	4	4	4.2	4	4	2	2	3	2	2	4	4	3	4	4	4	4	4	4
1	4	Graduate	Software Professional	1	0	1	1	1	1	1	5	5	5	4	4.75	4	4	4	4	4	4	4	4	5	4	4	4.2	4	4	4	2	4	3.6	4	4	2	2	3	2	2	4	4	3	4	4	4	4	4	4
0	4	PG and Above	Staff in Agricultural Research Sector	1	1	0	1	0	1	1	4	4	5	5	4.5	5	4	5	5	5	4.8	5	5	5	4	4	4.6	4	4	4	4	4	4	4	2	2	2	2.5	2	2	4	4	3	4	4	4	4	4	4
0	4	Graduate	Staff in Agricultural Research Sector	0	1	1	1	0	1	1	4	4	5	4	4.25	4	4	5	5	5	4.6	5	5	4	4	5	4.6	4	4	4	4	4	4	4	4	1	1	2.5	1	1	4	4	2.5	4	4	4	4	4	4
0	4	Graduate	Staff in Agricultural Research Sector	1	0	0	1	0	1	1	4	5	5	5	4.75	4	4	5	5	4	4.4	4	4	2	4	4	3.6	4	4	4	4	4	4	4	4	2	2	3	2	2	4	4	3	4	4	4	4	4	4
1	4	Graduate	Administrative Staff	0	0	1	1	0	1	1	4	4	4	4	4	4	4	4	5	5	4.4	4	5	4	4	4	4.2	4	4	4	4	4	4	4	4	1	1	2.5	1	1	4	4	2.5	4	4	4	4	4	4
0	4	Graduate	Staff in Agricultural Research Sector	1	1	0	0	0	1	1	4	4	4	4	4	4	4	4	4	4	4	4	4	4	4	4	4	5	4	5	4	4	4.4	4	4	1	2	2.75	1	1	4	5	2.75	4	4	4	4	4	4
0	4	PG and Above	Software Professional	0	0	1	1	1	1	1	4	4	4	4	4	4	5	4	4	4	4.2	4	4	4	4	4	4	4	4	4	4	4	4	4	4	2	2	3	2	2	4	4	3	4	4	4	4	4	4
1	4	Graduate	Staff in Agricultural Research Sector	1	0	1	1	0	1	1	4	4	4	4	4	4	4	4	4	4	4	4	4	4	4	4	4	5	5	4	4	4	4.4	4	4	1	1	2.5	1	2	4	4	2.75	4	4	4	4	4	4
1	4	Graduate	Software Professional	0	1	0	1	0	1	1	2	2	2	4	2.5	4	4	4	4	4	4	5	5	5	4	4	4.6	4	4	4	4	4	4	4	4	2	2	3	2	2	4	4	3	4	4	4	4	5	5
1	4	PG and Above	Software Professional	1	1	1	1	0	1	1	4	4	4	4	4	4	4	4	4	4	4	4	4	4	4	4	4	4	4	4	4	4	4	4	4	2	2	3	2	2	4	4	3	4	4	4	4	4	5
0	4	PG and Above	Software Professional	1	0	0	1	0	1	1	4	4	4	4	4	5	5	5	4	4	4.6	4	4	4	4	4	4	4	4	4	4	5	4.2	4	4	1	1	2.5	1	1	4	4	2.5	4	4	4	4	5	5
0	4	PG and Above	Software Professional	0	0	1	1	0	1	1	4	4	4	5	4.25	4	4	5	5	5	4.6	5	5	5	4	4	4.6	4	4	4	4	4	4	4	4	2	2	3	1	2	4	4	2.75	4	4	4	4	4	4
1	4	PG and Above	Staff in Agricultural Research Sector	1	0	1	1	0	1	1	2	2	4	2	2.5	4	4	5	4	5	4.4	5	4	4	4	4	4.2	4	4	5	4	4	4.2	4	4	2	2	3	2	2	4	4	3	5	4	4	4	4	5
0	4	PG and Above	Software Professional	0	0	0	1	1	1	1	2	4	4	4	3.5	4	5	5	5	4	4.6	4	4	4	4	4	4	4	4	4	4	4	4	4	4	2	2	3	2	2	4	4	3	4	4	5	4	4	5
0	4	Graduate	Software Professional	1	1	1	1	0	1	1	4	5	5	5	4.75	4	4	4	4	4	4	4	4	4	4	4	4	4	4	5	4	4	4.2	4	4	1	2	2.75	1	1	4	4	2.5	5	4	4	4	4	4
1	4	Plus Two (Intermediate)	Software Professional	1	0	1	1	1	1	1	4	5	5	5	4.75	4	4	4	4	4	4	4	4	4	4	4	4	4	4	4	4	4	4	4	4	2	2	3	2	2	4	4	3	4	4	4	4	4	4
0	4	Graduate	Software Professional	0	1	0	1	0	1	1	2	4	4	2	3	4	4	4	4	4	4	4	4	4	4	4	4	4	4	4	4	4	4	4	4	2	2	3	2	1	4	4	2.75	4	4	4	4	4	5
0	4	PG and Above	BPO employee	1	1	1	1	0	1	1	4	4	4	4	4	4	4	4	4	4	4	4	4	4	4	4	4	1	1	4	4	4	2.8	4	4	2	2	3	2	1	4	4	2.75	4	4	4	4	4	5
0	4	PG and Above	Software Professional	1	0	0	1	0	1	1	4	5	5	4	4.5	2	2	2	4	4	2.8	4	4	4	4	4	4	4	4	4	4	4	4	4	4	2	2	3	2	2	4	4	3	4	4	5	4	4	4
1	4	Other	Software Professional	0	1	1	1	0	1	1	4	4	4	4	4	4	4	4	4	4	4	4	4	4	4	4	4	4	4	4	5	4	4.2	4	5	1	1	2.75	2	2	4	4	3	4	5	5	4	4	5
0	4	PG and Above	Administrative Staff	1	0	0	1	0	1	1	5	4	5	5	4.75	4	4	4	4	4	4	4	4	4	4	4	4	4	4	4	4	4	4	4	5	2	2	3.25	2	2	4	4	3	5	4	4	4	4	4
0	4	PG and Above	Software Professional	0	0	1	1	0	1	1	4	4	5	5	4.5	4	4	4	5	4	4.2	4	4	4	4	2	3.6	4	4	4	5	4	4.2	4	4	2	2	3	2	2	4	4	3	5	4	5	4	4	4
1	4	Graduate	Staff in Agricultural Research Sector	1	0	1	1	0	1	1	4	4	5	5	4.5	2	2	4	2	4	2.8	4	4	4	1	2	3	4	4	4	2	4	3.6	4	4	2	2	3	2	2	4	4	3	4	4	4	4	4	4
0	4	SSC	Staff in Agricultural Research Sector	0	0	0	1	0	1	1	4	4	4	5	4.25	2	4	4	4	2	3.2	2	4	5	5	2	3.6	4	4	4	4	4	4	4	4	2	2	3	1	1	5	4	2.75	5	4	4	4	4	4
1	4	Plus Two (Intermediate)	Software Professional	1	0	1	1	0	1	1	4	4	4	4	4	4	5	5	5	5	4.8	5	4	4	5	5	4.6	4	4	1	4	4	3.4	4	4	2	2	3	1	1	4	4	2.5	4	4	4	4	4	4
0	4	PG and Above	Staff in Agricultural Research Sector	1	1	0	1	0	1	1	4	5	4	4	4.25	4	5	5	5	5	4.8	5	5	4	4	4	4.4	4	4	4	4	4	4	4	4	2	2	3	2	1	4	4	2.75	5	4	4	4	4	5
1	4	Graduate	Staff in Agricultural Research Sector	0	0	0	1	0	1	1	4	4	4	2	3.5	2	4	4	2	4	3.2	4	4	4	4	2	3.6	4	2	4	4	4	3.6	4	4	2	2	3	2	1	5	4	3	4	4	4	4	4	4
1	4	PG and Above	Staff in Agricultural Research Sector	1	0	1	1	0	1	1	4	4	4	4	4	4	4	4	4	4	4	4	4	4	4	4	4	4	4	4	4	4	4	4	4	2	2	3	1	2	5	4	3	4	4	5	4	4	4
1	4	PG and Above	Software Professional	0	0	1	1	0	1	1	4	4	4	4	4	4	5	5	4	4	4.4	4	4	4	4	4	4	4	4	4	4	4	4	4	4	2	2	3	2	2	4	4	3	4	4	4	4	4	4
1	4	Plus Two (Intermediate)	Staff in Agricultural Research Sector	0	0	1	1	0	1	1	4	4	4	4	4	4	4	4	4	4	4	4	4	5	4	4	4.2	4	2	4	4	4	3.6	4	4	2	2	3	2	4	5	4	3.75	4	4	4	4	4	4
0	4	PG and Above	Staff in Agricultural Research Sector	1	0	0	1	0	1	1	5	5	4	4	4.5	5	4	5	5	5	4.8	5	5	5	4	4	4.6	4	4	4	4	4	4	4	4	1	2	2.75	2	1	4	4	2.75	4	4	4	4	5	4
0	4	Plus Two (Intermediate)	Staff in Agricultural Research Sector	1	0	1	1	0	1	1	4	4	4	5	4.25	4	4	5	5	5	4.6	5	5	4	4	5	4.6	4	4	4	4	4	4	4	4	2	2	3	2	1	4	4	2.75	4	4	4	4	4	5
0	4	SSC	Staff in Agricultural Research Sector	1	1	0	1	1	1	1	4	4	4	4	4	4	4	5	5	4	4.4	4	4	2	4	4	3.6	4	4	4	4	4	4	4	4	2	2	3	2	1	4	4	2.75	4	4	4	4	5	4
1	4	Plus Two (Intermediate)	Staff in Agricultural Research Sector	0	0	0	1	1	1	1	4	4	4	4	4	4	4	4	5	5	4.4	4	5	4	4	4	4.2	4	4	4	4	4	4	4	4	2	2	3	2	1	5	4	3	4	4	4	4	4	4
0	4	PG and Above	Software Professional	1	1	1	1	0	1	1	4	4	4	4	4	4	4	4	4	4	4	4	4	4	4	4	4	4	4	4	4	4	4	4	4	2	2	3	2	2	4	4	3	4	2	4	4	5	4
0	4	Other	Staff in Agricultural Research Sector	0	0	0	1	1	1	1	4	4	4	4	4	4	5	4	4	4	4.2	4	4	4	4	4	4	4	4	4	4	4	4	4	4	2	2	3	2	1	4	4	2.75	4	4	4	4	4	5
											3.726
											0.875371					0.919279						0.88984						0.85828						0.846973					0.82623					0.875059
[truncated: 9 more columns]

## Sheet: Sheet1
GENDER
0	Are you married?	Do you have children	Do you experience stress during the job?	Do you smoke ?	Are you diabetic?	Do you have hypertension?	Do you consume alcohol
0	0	0	0	0	0	0	0
0	0	0	0	0	0	0	0
0	0	0	0	0	0	0	0
0	0	0	0	0	0	0	0
0	0	0	0	0	0	0	0
0	0	0	0	0	0	0	0
0	0	0	0	0	0	0	0
0	0	0	0	0	0	0	0
0	0	0	0	0	0	0	0
0	0	0	0	0	0	0	0
0	0	0	0	0	0	0	0
0	0	0	0	0	0	0	0
0	0	0	0	0	0	0	0
0	0	0	0	0	0	0	0
0	0	0	0	0	0	0	0
0	0	0	0	0	0	0	0
0	0	0	0	0	0	0	0
0	0	0	0	0	0	0	0
0	0	0	0	0	0	0	0
0	0	0	0	0	0	0	0
0	0	0	0	0	0	0	0
0	0	0	0	0	0	0	0
0	0	0	0	0	0	0	0
0	0	0	0	0	0	0	0
1	0	0	0	0	0	0	0
1	0	0	0	0	0	0	0
1	0	0	0	0	0	0	0
1	0	0	0	0	0	0	0
1	0	0	0	0	0	0	0
1	0	0	0	0	0	0	0
1	0	0	0	0	0	0	0
1	0	0	0	0	0	0	0
1	0	0	0	0	0	0	0
1	0	0	0	0	0	0	0
1	0	0	0	0	0	0	0
0	0	0	0	0	0	0	0
0	0	0	0	0	0	0	0
0	0	0	0	0	0	0	0
0	0	0	0	0	0	0	0
0	0	0	0	0	0	0	0
0	0	0	0	0	0	0	0
0	0	0	0	0	0	0	0
0	0	0	0	0	0	0	0
0	0	0	0	0	0	0	0
0	0	0	0	0	0	0	0
0	0	0	0	0	0	0	0
0	0	0	0	0	0	0	0
0	0	0	0	0	0	0	0
0	0	0	0	0	0	0	0
0	0	0	0	0	0	0	0
0	0	0	0	0	0	0	0
0	0	0	0	0	0	0	0
0	0	0	0	0	0	0	0
0	0	0	0	0	0	0	0
0	0	0	0	0	0	0	0
0	0	0	0	0	0	0	0
0	0	0	0	0	0	0	0
0	0	0	0	0	0	0	0
0	0	0	0	0	0	0	0
0	0	0	0	0	0	0	0
0	0	0	0	0	0	0	0
0	0	0	0	0	0	0	0
0	0	0	0	0	0	0	0
0	0	0	0	0	0	0	0
0	0	0	0	0	0	0	0
0	0	0	0	0	0	0	0
0	0	0	0	0	0	0	0
0	0	0	0	0	0	0	0
0	0	0	0	0	0	0	0
0	0	0	0	0	0	0	0
0	0	0	0	0	0	0	0
0	0	0	0	0	0	0	0
0	0	0	0	0	0	0	0
1	0	0	0	0	0	0	0
1	0	0	0	0	0	0	0
1	0	0	0	0	0	0	0
1	0	0	0	0	0	0	0
1	0	0	0	0	0	0	0
1	0	0	0	0	0	0	0
1	0	0	0	0	0	0	0
1	0	0	0	0	0	0	0
1	0	0	0	0	0	0	0
1	0	0	0	0	0	0	0
1	0	0	0	0	0	0	0
1	0	0	0	0	0	0	0
1	0	0	0	0	0	0	0
1	0	0	0	0	0	0	0
1	0	0	0	0	0	0	0
1	0	0	0	0	0	0	0
1	0	0	0	0	0	0	0
1	0	0	0	0	0	0	0
1	0	0	0	0	0	0	0
1	0	0	0	0	0	0	0
1	0	0	0	0	0	0	0
1	0	0	0	0	0	0	0
1	0	0	0	0	0	0	0
1	0	0	0	0	0	0	0
1	0	0	0	0	0	0	0
1	0	0	0	0	0	0	0
1	0	0	0	0	0	0	0
1	0	0	0	0	0	0	0
0	0	0	0	0	0	0	1
0	0	0	0	0	0	0	1
0	0	0	0	0	0	0	1
0	0	0	0	0	0	0	1
0	0	0	0	0	0	0	1
0	0	0	0	0	0	0	1
0	0	0	0	0	0	0	1
0	0	0	0	0	0	0	1
0	0	0	0	0	0	0	1
0	0	0	0	0	0	0	1
0	0	0	0	0	0	0	1
0	0	0	0	0	0	0	1
0	0	0	0	0	0	0	1
0	0	0	0	0	0	0	1
0	0	0	0	0	0	0	1
0	0	0	0	0	0	0	1
0	0	0	0	0	0	0	1
0	0	0	0	0	0	0	1
0	0	0	0	0	0	0	1
0	0	0	0	0	0	0	1
0	0	0	0	0	0	0	1
0	0	0	0	0	0	0	1
0	0	0	0	0	0	0	1
0	0	0	0	0	0	0	1
0	0	0	0	0	0	0	1
0	0	0	0	0	0	0	1
0	0	0	0	0	0	0	1
0	1	1	0	0	0	0	1
0	1	1	0	0	0	0	1
0	1	1	0	0	0	0	1
0	1	1	0	0	0	0	1
0	1	1	0	0	0	0	1
0	1	1	0	0	0	0	1
0	1	1	0	0	0	0	1
0	1	1	0	0	0	0	1
0	1	1	0	0	0	0	1
0	1	1	0	0	0	0	1
0	1	1	0	0	0	0	1
0	1	1	0	0	0	0	1
0	1	1	0	0	0	0	1
1	1	1	0	0	0	0	1
1	1	1	0	0	0	1	1
1	1	1	0	0	0	1	1
1	1	1	0	0	0	1	1
1	1	1	0	0	0	1	1
1	1	1	0	0	0	1	1
1	1	1	0	0	0	1	1
1	1	1	0	0	0	1	1
1	1	1	0	0	0	1	1
1	1	1	0	0	0	1	1
1	1	1	0	1	0	1	1
1	1	1	0	1	0	1	1
1	1	1	0	1	0	1	1
1	1	1	0	1	0	1	1
1	1	1	0	1	0	1	1
1	1	1	0	1	0	1	1
1	1	1	0	1	0	1	1
1	1	1	0	1	0	1	1
1	1	1	0	1	0	1	1
1	1	1	0	1	0	1	1
1	1	1	0	1	0	1	1
1	1	0	0	1	0	1	1
1	1	0	0	1	0	1	1
1	1	1	0	1	0	1	1
1	1	1	0	1	0	1	1
1	1	1	0	1	0	1	1
1	1	1	0	1	0	1	1
1	1	1	0	1	0	1	1
1	1	1	0	1	0	1	1
1	1	1	0	1	0	1	1
1	1	1	0	1	0	1	1
1	1	1	0	1	0	1	1
1	1	1	0	1	0	1	1
1	1	1	0	1	0	1	1
1	1	1	0	1	0	1	1
1	1	1	0	1	0	1	1
1	1	1	0	1	0	1	1
1	1	1	0	1	0	1	1
1	1	1	0	1	0	1	1
1	1	1	0	1	0	1	1
1	1	1	0	1	0	1	1
1	1	1	0	1	0	1	1
1	1	1	0	1	0	1	1
1	1	1	0	1	0	1	1
1	1	1	0	1	0	1	1
1	1	1	0	1	0	1	1
1	1	1	0	1	0	1	1
1	1	1	0	1	0	1	1
1	1	1	0	1	0	1	1
1	1	1	0	1	0	1	1
1	1	1	0	1	0	1	1
1	1	1	0	1	0	1	1
1	1	1	0	1	0	1	1
1	1	1	0	1	0	1	1
1	1	1	0	1	0	1	1
1	1	1	0	1	0	1	1
1	1	1	0	1	0	1	1
1	1	1	0	1	0	1	1
1	1	1	0	1	0	1	1
1	1	1	0	1	0	1	1
1	1	1	0	1	0	1	1
1	1	1	0	1	0	1	1
1	1	1	0	1	0	1	1
1	1	1	0	1	0	1	1
1	1	1	0	1	0	1	1
1	1	1	0	1	0	1	1
1	1	1	0	1	0	1	1
1	1	1	0	1	0	1	1
1	1	1	0	1	0	1	1
1	1	1	0	1	0	1	1
1	1	1	0	1	0	1	1
1	1	1	0	1	0	1	1
1	1	1	0	1	0	1	1
1	1	1	0	1	0	1	1
1	1	1	0	1	0	1	1
1	1	1	0	1	0	1	1
0	1	1	0	1	0	1	1
0	1	1	0	1	0	1	1
0	1	1	0	1	0	1	1
0	1	1	0	1	0	1	1
0	1	1	0	1	0	1	1
0	1	1	0	1	0	1	1
0	1	1	0	1	0	1	1
0	1	1	0	1	0	1	1
0	1	1	0	1	0	1	1
0	1	1	0	1	0	1	1
0	1	1	0	1	0	1	1
0	1	1	0	1	0	1	1
0	1	1	0	1	1	1	1
0	1	1	0	1	1	1	1
0	1	1	0	1	1	1	1
0	1	1	0	1	1	1	1
0	1	1	0	1	1	1	1
0	1	1	0	1	1	1	1
0	1	1	0	1	1	1	1
0	1	1	0	1	1	1	1
0	1	1	0	1	1	1	1
0	1	1	0	1	1	1	1
0	1	1	0	1	1	1	1
0	1	1	0	1	1	1	1
0	1	1	0	1	1	1	1
0	1	1	0	1	1	1	1
0	1	1	0	1	1	1	1
0	1	1	0	1	1	1	1
0	1	1	0	1	1	1	1
0	1	1	0	1	1	1	1
0	1	1	0	1	1	1	1
0	1	1	0	1	1	1	1
0	1	1	0	1	1	1	1
0	1	1	0	1	1	1	1
0	1	1	0	1	1	1	1
0	1	1	0	1	1	1	1
0	1	1	0	1	1	1	1
0	1	1	0	1	1	1	1
0	1	1	0	1	1	1	1
0	1	1	0	1	1	1	1
0	1	1	0	1	1	1	1
0	1	1	0	1	1	1	1
0	1	1	0	1	1	1	1
0	1	1	0	1	1	1	1
0	1	1	0	1	1	1	1
0	1	1	0	1	1	1	1
0	1	1	0	1	1	1	1
0	1	1	0	1	1	1	1
0	1	1	0	1	1	1	1
0	1	1	0	1	1	1	1
0	1	1	0	1	1	1	1
0	1	1	0	1	1	1	1
0	1	1	0	1	1	1	1
0	1	1	0	1	1	1	1
0	1	1	0	1	1	1	1
0	1	1	0	1	1	1	1
0	1	1	0	1	1	1	1
0	1	1	0	1	1	1	1
0	1	1	0	1	1	1	1
0	1	1	0	1	1	1	1
0	1	1	0	1	1	1	1
0	1	1	0	1	1	1	1
0	1	1	0	1	1	1	1
0	1	1	0	1	1	1	1
0	1	1	0	1	1	1	1
0	1	1	0	1	1	1	1
0	1	1	0	1	1	1	1
0	1	1	0	1	1	1	1
0	1	1	0	1	1	1	1
0	1	1	0	1	1	1	1
0	1	1	0	1	1	1	1
0	1	1	0	1	1	1	1
0	1	1	0	1	1	1	1
0	1	1	0	1	1	1	1
0	1	1	0	1	1	1	1
0	1	1	0	1	1	1	1
0	1	1	0	1	1	1	1
0	1	1	0	1	1	1	1
0	1	1	0	1	1	1	1
0	1	1	0	1	1	1	1
0	1	1	0	1	1	1	1
0	1	1	0	1	1	1	1
0	1	1	0	1	1	1	1
0	1	1	0	1	1	1	1
0	1	1	0	1	1	1	1
0	1	1	0	1	1	1	1
0	1	1	0	1	1	1	1
0	1	1	0	1	1	1	1
0	1	1	0	1	1	1	1
0	1	1	0	1	1	1	1
0	1	1	0	1	1	1	1
0	1	1	0	1	1	1	1
0	1	1	0	1	1	1	1
0	1	1	0	1	1	1	1
0	1	1	0	1	1	1	1
0	1	1	0	1	1	1	1
0	1	1	0	1	1	1	1
0	1	1	0	1	1	1	1
0	1	1	0	1	1	1	1
0	1	1	0	1	1	1	1
0	1	1	0	1	1	1	1
0	1	0	0	1	1	1	1
0	1	0	0	1	1	1	1
0	1	1	0	1	1	1	1
0	1	1	0	1	1	1	1
0	1	1	0	1	1	1	1
0	1	1	0	1	1	1	1
0	1	1	0	1	1	1	1
0	1	1	0	1	1	1	1
0	1	1	0	1	1	1	1
0	1	1	0	1	1	1	1
0	1	1	0	1	1	1	1
0	1	1	0	1	1	1	1
0	1	1	0	1	1	1	1
0	1	1	0	1	1	1	1
0	1	1	0	1	1	1	1
0	1	1	0	1	1	1	1
0	1	1	0	1	1	1	1
0	1	1	0	1	1	1	1
0	1	1	0	1	1	1	1
0	1	1	0	1	1	1	1
0	1	1	1	1	1	1	1
0	1	1	1	1	1	1	1
0	1	1	1	1	1	1	1
0	1	1	1	1	1	1	1
0	1	1	1	1	1	1	1
0	1	1	1	1	1	1	1
0	1	1	1	1	1	1	1
0	1	1	1	1	1	1	1
0	1	1	1	1	1	1	1
0	1	1	1	1	1	1	1
0	1	1	1	1	1	1	1
0	1	1	1	1	1	1	1
0	1	1	1	1	1	1	1
0	1	1	1	1	1	1	1
0	1	1	1	1	1	1	1
0	1	1	1	1	1	1	1
0	1	1	1	1	1	1	1
0	1	1	1	1	1	1	1
0	1	1	1	1	1	1	1
0	1	1	1	1	1	1	1
0	1	1	1	1	1	1	1
0	1	1	1	1	1	1	1
0	1	1	1	1	1	1	1
0	1	1	1	1	1	1	1
0	1	1	1	1	1	1	1
0	1	1	1	1	1	1	1
0	1	1	1	1	1	1	1
0	1	1	1	1	1	1	1
0	1	1	1	1	1	1	1
0	1	1	1	1	1	1	1
0	1	1	1	1	1	1	1
0	1	1	1	1	1	1	1
0	1	1	1	1	1	1	1
0	1	1	1	1	1	1	1
0	1	1	1	1	1	1	1
0	1	1	1	1	1	1	1
0	1	1	1	1	1	1	1
0	1	1	1	1	1	1	1
0	1	1	1	1	1	1	1
0	1	1	1	1	1	1	1
0	1	1	1	1	1	1	1
0	1	1	1	1	1	1	1
0	1	1	1	1	1	1	1
0	1	1	1	1	1	1	1
0	1	1	1	1	1	1	1
0	1	1	1	1	1	1	1
0	1	1	1	1	1	1	1
0	1	1	1	1	1	1	1
0	1	1	1	1	1	1	1
0	1	1	1	1	1	1	1
1	1	1	1	1	1	1	1
1	1	1	1	1	1	1	1
1	1	1	1	1	1	1	1
1	1	1	1	1	1	1	1
1	1	1	1	1	1	1	1
1	1	1	1	1	1	1	1
1	1	1	1	1	1	1	1
1	1	1	1	1	1	1	1
1	1	1	1	1	1	1	1
1	1	1	1	1	1	1	1
1	1	1	1	1	1	1	1
1	1	1	1	1	1	1	1
1	1	1	1	1	1	1	1
1	1	1	1	1	1	1	1
1	1	1	1	1	1	1	1
1	1	1	1	1	1	1	1
1	1	1	1	1	1	1	1
1	1	1	1	1	1	1	1
1	1	1	1	1	1	1	1
1	1	1	1	1	1	1	1
1	1	1	1	1	1	1	1
1	1	1	1	1	1	1	1
1	1	1	1	1	1	1	1
1	1	1	1	1	1	1	1
1	1	1	1	1	1	1	1
1	1	1	1	1	1	1	1
1	1	1	1	1	1	1	1
1	1	1	1	1	1	1	1
1	1	1	1	1	1	1	1
1	1	1	1	1	1	1	1
1	1	1	1	1	1	1	1
1	1	1	1	1	1	1	1
1	1	1	1	1	1	1	1
1	1	1	1	1	1	1	1
1	1	1	1	1	1	1	1
1	1	1	1	1	1	1	1
1	1	1	1	1	1	1	1
1	1	1	1	1	1	1	1
1	1	1	1	1	1	1	1
1	1	1	1	1	1	1	1
1	1	1	1	1	1	1	1
1	1	1	1	1	1	1	1
1	1	1	1	1	1	1	1
1	1	1	1	1	1	1	1
1	1	1	1	1	1	1	1
1	1	1	1	1	1	1	1
1	1	1	1	1	1	1	1
1	1	1	1	1	1	1	1
1	1	1	1	1	1	1	1
1	1	1	1	1	1	1	1
1	1	1	1	1	1	1	1
1	1	1	1	1	1	1	1
1	1	1	1	1	1	1	1
1	1	1	1	1	1	1	1
1	1	1	1	1	1	1	1
1	1	1	1	1	1	1	1
1	1	1	1	1	1	1	1
1	1	1	1	1	1	1	1
1	1	1	1	1	1	1	1
1	1	1	1	1	1	1	1
1	1	1	1	1	1	1	1
1	1	1	1	1	1	1	1
1	1	1	1	1	1	1	1
1	1	1	1	1	1	1	1
1	1	1	1	1	1	1	1
1	1	1	1	1	1	1	1
1	1	1	1	1	1	1	1
1	1	1	1	1	1	1	1
1	1	1	1	1	1	1	1
1	1	1	1	1	1	1	1
1	1	1	1	1	1	1	1
1	1	1	1	1	1	1	1
1	1	1	1	1	1	1	1
1	1	1	1	1	1	1	1
1	1	1	1	1	1	1	1
1	1	1	1	1	1	1	1
1	1	1	1	1	1	1	1
1	1	1	1	1	1	1	1
1	1	1	1	1	1	1	1
1	1	1	1	1	1	1	1
1	1	1	1	1	1	1	1
1	1	1	1	1	1	1	1
1	1	1	1	1	1	1	1
1	1	1	1	1	1	1	1
1	1	1	1	1	1	1	1
1	1	1	1	1	1	1	1
1	1	1	1	1	1	1	1
1	1	1	1	1	1	1	1
1	1	1	1	1	1	1	1
1	1	1	1	1	1	1	1
1	1	1	1	1	1	1	1
1	1	1	1	1	1	1	1
1	1	1	1	1	1	1	1
1	1	1	1	1	1	1	1
1	1	1	1	1	1	1	1
1	1	1	1	1	1	1	1
1	1	1	1	1	1	1	1
1	1	1	1	1	1	1	1
1	1	1	1	1	1	1	1
1	1	1	1	1	1	1	1
1	1	1	1	1	1	1	1
1	1	1	1	1	1	1	1
1	1	1	1	1	1	1	1
1	1	1	1	1	1	1	1
1	1	1	1	1	1	1	1
1	1	1	1	1	1	1	1
1	1	1	1	1	1	1	1
1	1	1	1	1	1	1	1
1	1	1	1	1	1	1	1
1	1	1	1	1	1	1	1
1	1	1	1	1	1	1	1
1	1	1	1	1	1	1	1
1	1	1	1	1	1	1	1
1	1	1	1	1	1	1	1
1	1	1	1	1	1	1	1
1	1	1	1	1	1	1	1
1	1	1	1	1	1	1	1
1	1	1	1	1	1	1	1
1	1	1	1	1	1	1	1
1	1	1	1	1	1	1	1
1	1	1	1	1	1	1	1
1	1	1	1	1	1	1	1
1	1	1	1	1	1	1	1
2	1	1	1	1	1	1	1
	1	1	1	1	1	1	1

## Sheet: Sheet2
Statistics
		Gender	AgeGroup	SelfProficiency	Technology	Teamwork	JobSatisfaction	IntrinsicMotivation	ExtrinsicMotivation	Performance	JobStress
N	Valid	513	513	513	513	513	513	513	513	513	513
	Missing	0	0	0	0	0	0	0	0	0	0
Mean		0.4659	2.3665	3.7266	3.6815	3.6904	3.694	3.8757	3.9698	3.7096	3.2858
Std. Deviation		0.49932	0.95719	0.61709	0.66107	0.59838	0.54813	0.57688	0.54581	0.43062	0.69145
Skewness		0.137	0.11	-0.875	-0.497	-0.723	-1.113	-0.829	-0.848	-1.382	0.184
Std. Error of Skewness		0.108	0.108	0.108	0.108	0.108	0.108	0.108	0.108	0.108	0.108
Kurtosis		-1.989	-0.939	0.682	-0.468	0.078	1.303	0.081	0.568	3.8	-0.992
Std. Error of Kurtosis		0.215	0.215	0.215	0.215	0.215	0.215	0.215	0.215	0.215	0.215
	Mean	Standard Deviation	Skewness	Kurtosis
Gender	0.4659	0.49932	0.137	-1.989
Age	2.3665	0.95719	0.11	-0.939
Self Prociency	3.7266	0.61709	-0.875	0.682
Technology	3.6815	0.66107	-0.497	-0.468
Teamwork	3.6904	0.59838	-0.723	0.078
Job Satisfaction	3.694	0.54813	-1.113	1.303
Intrinsic Motivation]	3.8757	0.57688	-0.829	0.081
ExtrinsicbMotivation	3.9698	0.54581	-0.848	0.568
Performance	3.7096	0.43062	-1.382	3.8
Job Stress	3.2858	0.69145	0.184	-0.992
